# Supplementary material for: No More Tears: Mining Sequencing Data for Novel Bt Cry Toxins with CryProcessor
Source: MDPI journal article supplement (doi:10.3390/toxins12030204), 2020-03-23
Supplement: s1 [file s1]

# Supplementary Materials: No More Tears: Mining Sequencing Data for Novel *Bt* Cry Toxins with CryProcessor

Anton E. Shikov, Yury V. Malovichko, Rostislav K. Skitchenko, Anton A. Nizhnikov and Kirill S. Antonets

**Table 1.** The full list of assemblies used for the benchmarking procedure.

|                 |                 |                 |                 |                 |
|-----------------|-----------------|-----------------|-----------------|-----------------|
| GCA_000008505.1 | GCA_002561795.1 | GCA_002236945.1 | GCA_002911795.1 | GCA_002570625.1 |
| GCA_000015065.1 | GCA_002561825.1 | GCA_002243685.1 | GCA_002911825.1 | GCA_002570635.1 |
| GCA_000092165.1 | GCA_002562035.1 | GCA_002268645.2 | GCA_002911835.1 | GCA_002570705.1 |
| GCA_000161475.1 | GCA_002562045.1 | GCA_002385135.1 | GCA_002911865.1 | GCA_002570735.1 |
| GCA_000161495.1 | GCA_002562055.1 | GCA_002550055.1 | GCA_002911875.1 | GCA_002570815.1 |
| GCA_000161515.1 | GCA_002562205.1 | GCA_002550185.1 | GCA_002911905.1 | GCA_002570855.1 |
| GCA_000161535.1 | GCA_002562295.1 | GCA_002550215.1 | GCA_002911925.1 | GCA_002570885.1 |
| GCA_000161555.1 | GCA_002562415.1 | GCA_002550295.1 | GCA_002911945.1 | GCA_002570925.1 |
| GCA_000161575.1 | GCA_002562425.1 | GCA_002550455.1 | GCA_002911955.1 | GCA_002570955.1 |
| GCA_000161595.1 | GCA_002562665.1 | GCA_002550605.1 | GCA_002911965.1 | GCA_002571025.1 |
| GCA_000161615.1 | GCA_002562915.1 | GCA_002550745.1 | GCA_002911975.1 | GCA_002571105.1 |
| GCA_000161635.1 | GCA_002562975.1 | GCA_002550785.1 | GCA_002912025.1 | GCA_002571115.1 |
| GCA_000161655.1 | GCA_002563045.1 | GCA_002550915.1 | GCA_002912045.1 | GCA_002571245.1 |
| GCA_000161675.1 | GCA_002563145.1 | GCA_002550955.1 | GCA_002912065.1 | GCA_002571265.1 |
| GCA_000161695.1 | GCA_002563165.1 | GCA_002551615.1 | GCA_002912075.1 | GCA_002571305.1 |
| GCA_000161715.1 | GCA_002563205.1 | GCA_002551695.1 | GCA_002912105.1 | GCA_002571315.1 |
| GCA_000161735.1 | GCA_002563275.1 | GCA_002551805.1 | GCA_002912115.1 | GCA_002572135.1 |
| GCA_000167695.1 | GCA_002564405.1 | GCA_002551885.1 | GCA_002912125.1 | GCA_002573505.1 |
| GCA_000190515.1 | GCA_002564505.1 | GCA_002551895.1 | GCA_002912135.1 | GCA_002574095.1 |
| GCA_000193355.1 | GCA_002564545.1 | GCA_002551955.1 | GCA_002912215.1 | GCA_002574115.1 |
| GCA_000292455.1 | GCA_002564645.1 | GCA_002552035.1 | GCA_002921215.1 | GCA_002574125.1 |
| GCA_000292705.1 | GCA_002564955.1 | GCA_002552095.1 | GCA_002969075.1 | GCA_002574265.1 |
| GCA_000300475.1 | GCA_002565085.1 | GCA_002552245.1 | GCA_002994815.1 | GCA_002574295.1 |
| GCA_000306745.1 | GCA_002565105.1 | GCA_002552325.1 | GCA_002998815.1 | GCA_002574325.1 |
| GCA_000338755.1 | GCA_002565195.1 | GCA_002552395.1 | GCA_002998855.1 | GCA_002574365.1 |
| GCA_000341665.1 | GCA_002565265.1 | GCA_002552415.1 | GCA_003046465.1 | GCA_002574435.1 |
| GCA_000342025.1 | GCA_002565385.1 | GCA_002552905.1 | GCA_003054785.1 | GCA_002574475.1 |
| GCA_000387405.2 | GCA_002565435.1 | GCA_002552915.1 | GCA_003112375.1 | GCA_002574495.1 |
| GCA_000468975.2 | GCA_002565845.1 | GCA_002552985.1 | GCA_003150715.1 | GCA_002574505.1 |
| GCA_000468995.3 | GCA_002565905.1 | GCA_002553035.1 | GCA_003312445.1 | GCA_002574575.1 |
| GCA_000497525.2 | GCA_002565945.1 | GCA_002553045.1 | GCA_003399465.1 | GCA_002574595.1 |
| GCA_000500585.1 | GCA_002566135.1 | GCA_002553055.1 | GCA_003408695.1 | GCA_002574645.1 |
| GCA_000503755.1 | GCA_002566145.1 | GCA_002553105.1 | GCA_003444735.1 | GCA_002574675.1 |
| GCA_000530375.1 | GCA_002566295.1 | GCA_002553205.1 | GCA_003445395.1 | GCA_002574695.1 |
| GCA_000571955.1 | GCA_002566325.1 | GCA_002553315.1 | GCA_003546665.1 | GCA_002574725.1 |
| GCA_000585975.1 | GCA_002566355.1 | GCA_002555365.1 | GCA_003612265.1 | GCA_002574735.1 |
| GCA_000600315.1 | GCA_002566395.1 | GCA_002558015.1 | GCA_003626955.1 | GCA_002574805.1 |
| GCA_000688795.1 | GCA_002566485.1 | GCA_002558035.1 | GCA_003719805.1 | GCA_002574895.1 |
| GCA_000710255.1 | GCA_002566545.1 | GCA_002558075.1 | GCA_003991175.1 | GCA_002574935.1 |
| GCA_000717535.1 | GCA_002566555.1 | GCA_002558235.1 | GCA_004009875.1 | GCA_002575015.1 |
| GCA_000747545.1 | GCA_002566645.1 | GCA_002558335.1 | GCA_004153515.1 | GCA_002575035.1 |
| GCA_000774075.2 | GCA_002566715.1 | GCA_002558355.1 | GCA_004167115.1 | GCA_002575075.1 |
| GCA_000803665.1 | GCA_002566935.1 | GCA_002558385.1 | GCA_004194435.2 | GCA_002575195.1 |
| GCA_000816555.1 | GCA_002567205.1 | GCA_002558525.1 | GCA_004194455.1 | GCA_002575305.1 |
| GCA_000832485.1 | GCA_002567265.1 | GCA_002558545.1 | GCA_004194475.1 | GCA_002575325.1 |

|                 |                 |                 |                 |                 |
|-----------------|-----------------|-----------------|-----------------|-----------------|
| GCA_000832825.1 | GCA_002567295.1 | GCA_002558555.1 | GCA_004309715.1 | GCA_002575365.1 |
| GCA_000832925.1 | GCA_002567585.1 | GCA_002558595.1 | GCA_004330315.1 | GCA_002575395.1 |
| GCA_000833085.1 | GCA_002567865.1 | GCA_002558635.1 | GCA_004330415.1 | GCA_002575445.1 |
| GCA_000833655.1 | GCA_002567875.1 | GCA_002558795.1 | GCA_004346705.1 | GCA_002575615.1 |
| GCA_000835025.1 | GCA_002567905.1 | GCA_002558815.1 | GCA_004354265.1 | GCA_002575645.1 |
| GCA_000835235.1 | GCA_002567945.1 | GCA_002558915.1 | GCA_004368515.1 | GCA_002575705.1 |
| GCA_000878525.1 | GCA_002567955.1 | GCA_002558995.1 | GCA_004519705.1 | GCA_002575895.1 |
| GCA_000940785.1 | GCA_002567995.1 | GCA_002559295.1 | GCA_900094685.1 | GCA_002575925.1 |
| GCA_000948155.1 | GCA_002568045.1 | GCA_002559535.1 | GCA_900108905.1 | GCA_002576025.1 |
| GCA_000948235.1 | GCA_002568055.1 | GCA_002559825.1 | GCA_002560645.1 | GCA_002576055.1 |
| GCA_000948325.1 | GCA_002568085.1 | GCA_002559855.1 | GCA_002560695.1 | GCA_002576125.1 |
| GCA_000969665.1 | GCA_002568175.1 | GCA_002559875.1 | GCA_002560805.1 | GCA_002576135.1 |
| GCA_001017635.1 | GCA_002568285.1 | GCA_002559955.1 | GCA_002560815.1 | GCA_002576375.1 |
| GCA_001182785.1 | GCA_002568345.1 | GCA_002560005.1 | GCA_002560855.1 | GCA_002576405.1 |
| GCA_001183785.1 | GCA_002568385.1 | GCA_002560055.1 | GCA_002560875.1 | GCA_002576485.1 |
| GCA_001238465.1 | GCA_002568515.1 | GCA_002560305.1 | GCA_002560885.1 | GCA_002576565.1 |
| GCA_001276195.1 | GCA_002568525.1 | GCA_002560335.1 | GCA_002560925.1 | GCA_002576585.1 |
| GCA_001296435.1 | GCA_002568585.1 | GCA_002560455.1 | GCA_002561045.1 | GCA_002576645.1 |
| GCA_001402735.1 | GCA_002568595.1 | GCA_002560465.1 | GCA_002561175.1 | GCA_002576655.1 |
| GCA_001420855.1 | GCA_002569275.1 | GCA_002560515.1 | GCA_002561275.1 | GCA_002576665.1 |
| GCA_001455345.1 | GCA_002569645.1 | GCA_002560605.1 | GCA_002561335.1 | GCA_002576755.1 |
| GCA_001517195.1 | GCA_002569825.1 | GCA_002561585.1 | GCA_002561375.1 | GCA_002576765.1 |
| GCA_001548175.1 | GCA_002570475.1 | GCA_002561645.1 | GCA_002561465.1 | GCA_002576875.1 |
| GCA_001573165.1 | GCA_002570505.1 | GCA_002561665.1 | GCA_002561475.1 | GCA_002576925.1 |
| GCA_001595725.1 | GCA_002570585.1 | GCA_002561735.1 | GCA_002585935.1 | GCA_002577005.1 |
| GCA_001598095.1 | GCA_002147575.1 | GCA_002146695.1 | GCA_002586085.1 | GCA_002577025.1 |
| GCA_001618665.1 | GCA_002147605.1 | GCA_002146705.1 | GCA_002589015.1 | GCA_002577255.1 |
| GCA_001640965.1 | GCA_002147635.1 | GCA_002146725.1 | GCA_002589045.1 | GCA_002577325.1 |
| GCA_001675515.1 | GCA_002147645.1 | GCA_002146755.1 | GCA_002795225.1 | GCA_002577445.1 |
| GCA_001677055.1 | GCA_002147655.1 | GCA_002146785.1 | GCA_002893505.1 | GCA_002577525.1 |
| GCA_001685565.1 | GCA_002147685.1 | GCA_002146815.1 | GCA_002893515.1 | GCA_002577565.1 |
| GCA_001692675.1 | GCA_002147715.1 | GCA_002146825.1 | GCA_002893525.1 | GCA_002577605.1 |
| GCA_001721165.1 | GCA_002147725.1 | GCA_002146845.1 | GCA_002893565.1 | GCA_002577625.1 |
| GCA_001757675.1 | GCA_002147745.1 | GCA_002146865.1 | GCA_002893585.1 | GCA_002577805.1 |
| GCA_001757685.1 | GCA_002147755.1 | GCA_002146885.1 | GCA_002893605.1 | GCA_002577835.1 |
| GCA_001757695.1 | GCA_002147795.1 | GCA_002146905.1 | GCA_002911745.1 | GCA_002578165.1 |
| GCA_001757745.1 | GCA_002147805.1 | GCA_002146925.1 | GCA_002911755.1 | GCA_002578625.1 |
| GCA_001757755.1 | GCA_002147825.1 | GCA_002146945.1 | GCA_002911785.1 | GCA_002581075.1 |
| GCA_001757775.1 | GCA_002147835.1 | GCA_002146975.1 | GCA_002147395.1 | GCA_002582575.1 |
| GCA_001880115.1 | GCA_002147895.1 | GCA_002146985.1 | GCA_002147415.1 | GCA_002582685.1 |
| GCA_001880125.1 | GCA_002147905.1 | GCA_002147005.1 | GCA_002147425.1 | GCA_002582925.1 |
| GCA_001883875.1 | GCA_002147935.1 | GCA_002147025.1 | GCA_002147435.1 | GCA_002583105.1 |
| GCA_001883945.1 | GCA_002147955.1 | GCA_002147055.1 | GCA_002147475.1 | GCA_002583235.1 |
| GCA_001968805.1 | GCA_002147965.1 | GCA_002147085.1 | GCA_002147495.1 | GCA_002583285.1 |
| GCA_002024545.1 | GCA_002147985.1 | GCA_002147105.1 | GCA_002147505.1 | GCA_002583445.1 |
| GCA_002025105.1 | GCA_002148015.1 | GCA_002147125.1 | GCA_002147535.1 | GCA_002583505.1 |
| GCA_002119445.1 | GCA_002148025.1 | GCA_002147155.1 | GCA_002147555.1 | GCA_002583895.1 |
| GCA_002146315.1 | GCA_002148045.1 | GCA_002147165.1 | GCA_002147565.1 | GCA_002584055.1 |
| GCA_002146325.1 | GCA_002148065.1 | GCA_002147185.1 | GCA_002146495.1 | GCA_002584185.1 |
| GCA_002146335.1 | GCA_002148095.1 | GCA_002147235.1 | GCA_002146505.1 | GCA_002584205.1 |
| GCA_002146345.1 | GCA_002148105.1 | GCA_002147245.1 | GCA_002146525.1 | GCA_002584325.1 |
| GCA_002146365.1 | GCA_002148135.1 | GCA_002147255.1 | GCA_002146545.1 | GCA_002584605.1 |
| GCA_002146395.1 | GCA_002148155.1 | GCA_002147295.1 | GCA_002146595.1 | GCA_002584855.1 |
| GCA_002146405.1 | GCA_002173755.1 | GCA_002147315.1 | GCA_002146605.1 | GCA_002584925.1 |
| GCA_002146425.1 | GCA_002184245.1 | GCA_002147325.1 | GCA_002146615.1 | GCA_002585315.1 |
| GCA_002146445.1 | GCA_002192515.1 | GCA_002147335.1 | GCA_002146625.1 | GCA_002585635.1 |

|                 |                 |                 |                 |                 |
|-----------------|-----------------|-----------------|-----------------|-----------------|
| GCA_002146465.1 | GCA_002222555.1 | GCA_002147375.1 | GCA_002146655.1 | GCA_002585795.1 |
| GCA_002146665.1 |                 |                 |                 |                 |

**Table S2.** Comparison of find domains mode of CryProcessor with an online service of BtToxin\_scanner on the five assemblies of *Bt* genomes from NCBI Assembly database. Domain structure screens were taken from Pfam database.

1) Assembly: GCA\_002146445.

| Accession  | CryProcessor |          | BtToxin_Scanner |          |
|------------|--------------|----------|-----------------|----------|
|            | Top hit      | Identity | Top hit         | Identity |
| OTW84525.1 | Cry1Ie2      | 100      | Cry1Ie1         | 95.97    |
| OTW84402.1 | Cry1Na1      | 100      | Cry1Ca5         | 51.54    |
| OTW84346.1 | Cry9Da4      | 99.7     | Cry9Da1         | 99.53    |
| OTW81421.1 | Cry9Eb3      | 95.6     | Cry9Eb1         | 94.97    |
| OTW84522.1 | –            | –        | Cry9Da1         | 99.53    |
| OTW84533.1 | –            | –        | Cry9Da1         | 99.53    |

Model for OTW84522.1, OTW84533.1:

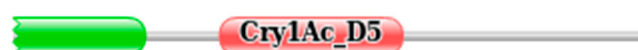

Model OTW84525.1, OTW84346.1, OTW84346.1 and OTW81421.1:

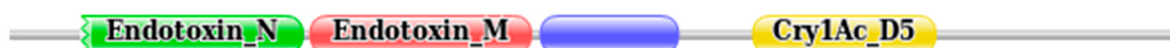

2) Assembly: GCA\_000161475

| Accession  | CryProcessor |          | BtToxin_Scanner |          |
|------------|--------------|----------|-----------------|----------|
|            | Top hit      | Identity | Top hit         | Identity |
| EEM19417.1 | Cry67Aa2     | 100      | Cry67Aa2        | 100      |
| EEM19405.1 | Cry7Ba1      | 85.6     | Cry7Ba1         | 85.6     |
| EEM19403.1 | Cry7Ea2      | 100      | Cry7Ea3         | 100      |
| EEM19308.1 | Cry61Aa3     | 100      | Cry61Aa3        | 100      |
| EEM19090.1 | Cry7Fa2      | 99.9     | Cry7Fa2         | 99.91    |
| EEM19459.1 | –            | –        | Cry7Ca1         | 94.31    |

EEM19459.1: no domains found.

3) Assembly: GCA\_000161715.

| Accession  | CryProcessor |          | BtToxin_Scanner |          |
|------------|--------------|----------|-----------------|----------|
|            | Top hit      | Identity | Top hit         | Identity |
| EEM92924.1 | Cry1Hb1      | 100      | Cry1Hb1         | 100      |
| EEM92927.1 | Cry1Bb1      | 99.9     | Cry1Bb1         | 99.92    |
| EEM92934.1 | Cry1Ab18     | 100      | Cry1Ab18        | 100      |
| EEM92941.1 | Cry1Nb1      | 100      | Cry1Ca5         | 54.08    |
| EEM92947.1 | Cry1Ja2      | 100      | Cry1Ja1         | 99.57    |
| EEM92952.1 | Cry1Id1      | 100      | Cry1Id1         | 100      |
| EEM92953.1 | Cry1Da3      | 99.9     | Cry1Da2         | 96.82    |
| EEM92570.1 | Cry8Aa1      | 47.1     | Cry8Ba1         | 46.58    |
| EEM93055.1 | Cry2Ad1      | 100      | Cry2Ad1         | 100      |
| EEM92620.1 | –            | –        | Cry6Aa3         | 28.45    |
| EEM93105.1 | –            | –        | Cry11Ba1        | 24.62    |
| EEM92191.1 | –            | –        | NO              | NO       |

EM92620.1 model:

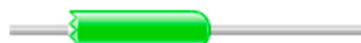

EEM93105.1 model:

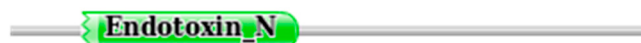

EEM92191.1: no domains found.

4) Assembly: GCA\_002146755

| Accession  | CryProcessor |          | BtToxin_Scanner |          |
|------------|--------------|----------|-----------------|----------|
|            | Top hit      | Identity | Top hit         | Identity |
| OTY10661.1 | Cry7Ka1      | 100      | Cry7Ab4         | 67.84    |
| OTY00887.1 | Cry7Cb1      | 60.4     | Cry7Ba1         | 57.07    |
| OTY00858.1 | Cry7Gc1      | 99.8     | Cry7Ba1         | 59.77    |
| OTY09875.1 | –            | –        | Cry7Ba1         | 95.72    |
| OTY10663.1 | –            | –        | Cry7Ba1         | 95.72    |

OTY09875.1 and OTY10663.1: no domains found.

5) Assembly: GCA\_002893565.

| Accession  | CryProcessor |          | BtToxin_Scanner |          |
|------------|--------------|----------|-----------------|----------|
|            | Top hit      | Identity | Top hit         | Identity |
| PNK41404.1 | Cry1Ka2      | 100      | Cry1Ka1         | 99.16    |
| PNK40066.1 | Cry1Fb3      | 99.9     | Cry1Fb4         | 99.78    |
| PNK40029.1 | Cry1Da3      | 99.9     | Cry1Da2         | 98.69    |
| PNK40024.1 | Cry1Ib11     | 99.9     | Cry1Ib9         | 98.75    |
| PNK40012.1 | Cry1Ab18     | 100      | Cry1Ab18        | 100      |
| PNK46490.1 | Cry1Bb1      | 99.9     | Cry1Bb1         | 99.91    |
| PNK46492.1 | Cry1Hb1      | 100      | Cry1Hb1         | 100      |
| PNK42250.1 | Cry1Id1      | 100      | Cry1Id1         | 100      |
| PNK42253.1 | Cry1Ja2      | 100      | Cry1Ja1         | 99.57    |
| PNK42258.1 | Cry1Nb1      | 100      | Cry1Ca5         | 54.08    |
| PNK36334.1 | –            | –        | Cry2Ad1         | 100      |
| PNK36450.1 | –            | –        | Cry1Db1         | 100      |
| PNK37031.1 | –            | –        | Cry1Ga1         | 90.18    |
| PNK38095.1 | –            | –        | Cry2Aa9         | 100      |
| PNK40094.1 | –            | –        | Cry1Ab18        | 100      |
| PNK41461.1 | –            | –        | Cry2Ad1         | 100      |
| PNK50401.1 | –            | –        | NO              | NO       |

PNK36334.1 model:

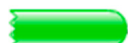

PNK38095.1 model:

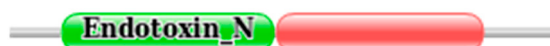

PNK41461.1 model:

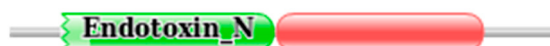

PNK36450.1, PNK37031.1, PNK40094.1 and PNK50401.1: no domains found.

**Table S3.** Comparison of CryProcessor in fd mode with BtToxin\_scanner database and pipeline. The comparison was performed on all *Bt* genomes from NCBI Assembly database. The last two columns denote CryProcessor output with the database taken from the standalone version of BtToxin\_scanner.

| Accession  | CryProcessor<br>(native db) |          | BtToxin_scanner<br>(standalone) |          | BtToxin_scanner<br>(online) |          | CryProcessor<br>(BtToxin_scanner db) |          |
|------------|-----------------------------|----------|---------------------------------|----------|-----------------------------|----------|--------------------------------------|----------|
|            | Top Hit                     | Identity | Top Hit                         | Identity | Top Hit                     | Identity | Top Hit                              | Identity |
| EEM19417.1 | Cry67Aa2                    | 100.0    | Cry67Aa2                        | 100.00   | Cry67Aa2                    | 100.00   | Cry67Aa2                             | 100.0    |
| EEM19403.1 | Cry7Ea2                     | 100.0    | Cry7Ea3                         | 100.00   | Cry7Ea3                     | 100.00   | Cry7Ea3                              | 100.0    |
| EEM19308.1 | Cry61Aa3                    | 100.0    | Cry61Aa3                        | 100.00   | Cry61Aa3                    | 100.00   | Cry61Aa3                             | 100.0    |
| EEM19090.1 | Cry7Fa2                     | 99.9     | Cry7Fa2                         | 99.91    | Cry7Fa2                     | 100.00   | Cry7Fa2                              | 99.9     |
| EEM32076.1 | Cry1Ab12                    | 100.0    | Cry1Ab9                         | 100.00   | Cry1Ab5                     | 100.00   | Cry1Ab1                              | 100.0    |
| EEM31561.1 | Cry1Ba1                     | 100.0    | Cry1Ba5                         | 100.00   | Cry1Ba5                     | 100.00   | Cry1Ba1                              | 100.0    |
| EEM38018.1 | Cry1Aa13                    | 100.0    | Cry1Aa9                         | 100.00   | Cry1Aa9                     | 100.00   | Cry1Aa13                             | 100.0    |
| EEM44869.1 | Cry5Ca1                     | 100.0    | Cry5Ca2                         | 100.00   | *                           | *        | Cry5Ca2                              | 100.0    |
| EEM44456.1 | Cry65Aa2                    | 99.9     | Cry65Aa2                        | 99.91    | Cry65Aa2                    | 100.00   | Cry65Aa2                             | 99.9     |
| EEM44315.1 | Cry5Da1                     | 100.0    | Cry5Da2                         | 100.00   | *                           | *        | Cry5Da2                              | 100.0    |
| EEM44256.1 | Cry5Ea2                     | 100.0    | Cry5Ea2                         | 100.00   | *                           | *        | Cry5Ea2                              | 100.0    |
| EEM50110.1 | Cry1Ac10                    | 100.0    | Cry1Ac9                         | 100.00   | Cry1Ac9                     | 100.00   | Cry1Ac1                              | 100.0    |
| EEM55953.1 | Cry7Ab4                     | 99.8     | Cry7Ab4                         | 99.82    | Cry7Ab4                     | 100.00   | Cry7Ab4                              | 99.8     |
| EEM62552.1 | Cry1Ba1                     | 100.0    | Cry1Ba5                         | 100.00   | Cry1Ba5                     | 100.00   | Cry1Ba1                              | 100.0    |
| EEM62204.1 | Cry1Ab12                    | 100.0    | Cry1Ab9                         | 100.00   | Cry1Ab5                     | 100.00   | Cry1Ab1                              | 100.0    |
| EEM68667.1 | Cry41Ba2                    | 100.0    | Cry41Ba2                        | 100.00   | Cry41Ba2                    | 100.00   | Cry41Ba2                             | 100.0    |
| EEM68355.1 | Cry41Ba1                    | 100.0    | Cry66Aa2                        | 100.00   | Cry66Aa2                    | 100.00   | Cry66Aa2                             | 100.0    |
| EEM86551.1 | Cry8Ma3                     | 100.0    | Cry8-like                       | 100.00   | Cry8Ma2                     | 100.00   | Cry8-like                            | 100.0    |
| EEM93055.1 | Cry2Ad1                     | 100.0    | Cry2Ad1                         | 100.00   | *                           | *        | Cry2Ad1                              | 100.0    |
| EEM92924.1 | Cry1Hb1                     | 100.0    | Cry1Hb1                         | 100.00   | Cry1Hb1                     | 100.00   | Cry1Hb1                              | 100.0    |
| EEM92927.1 | Cry1Bb1                     | 99.9     | Cry1Bb1                         | 99.92    | Cry1Bc1                     | 100.00   | Cry1Bb1                              | 99.9     |
| EEM92934.1 | Cry1Ab18                    | 100.0    | Cry1Ab18                        | 100.00   | Cry1Ab18                    | 100.00   | Cry1Ab18                             | 100.0    |
| EEM92941.1 | Cry1Nb1                     | 100.0    | –                               | –        | Cry1Ca4                     | 52.73    | PesticidalProtein                    | 100.0    |
| EEM92947.1 | Cry1Ja2                     | 100.0    | Cry1Ja1                         | 99.57    | Cry1Ja1                     | 99.09    | Cry1Ja1                              | 99.6     |
| EEM92952.1 | Cry1Id1                     | 100.0    | Cry1Id1                         | 100.00   | Cry1Id1                     | 100.00   | Cry1Id1                              | 100.0    |
| EEM92953.1 | Cry1Da3                     | 99.9     | Cry1Da2                         | 96.82    | Cry1Da2                     | 99.82    | Cry1Da1                              | 96.8     |
| EEM92570.1 | Cry8Aa1                     | 47.1     | Cry8Ba1                         | 46.58    | Cry8Aa1                     | 47.00    | Cry8Aa1                              | 47.1     |
| EEM99282.1 | Cry10Aa3                    | 100.0    | Cry10Aa4                        | 100.00   | Cry10Aa4                    | 100.00   | Cry10Aa3                             | 100.0    |
| EEM99034.1 | Cry11Aa4                    | 100.0    | Cry11Aa4                        | 100.00   | *                           | *        | Cry11Aa4                             | 100.0    |
| ADY24756.1 | Cry26Aa1                    | 95.4     | –                               | –        | Cry26Aa1                    | 100.00   | Cry26Aa1                             | 95.4     |
| ADY24870.1 | Cry28Aa2                    | 99.7     | Cry28Aa2                        | 99.73    | Cry28Aa2                    | 99.47    | Cry28Aa2                             | 99.7     |
| ADY25012.1 | Cry28Aa2                    | 99.6     | Cry28Aa2                        | 99.65    | Cry28Aa2                    | 99.47    | Cry28Aa2                             | 99.6     |
| AEA19203.1 | Cry1Ba1                     | 99.9     | Cry1Ba5                         | 99.92    | Cry1Ba5                     | 100.00   | Cry1Ba1                              | 99.9     |
| AEA19603.1 | Cry2Ab16                    | 100.0    | Cry2Ab3                         | 100.00   | *                           | *        | Cry2Ab1                              | 100.0    |
| AEA19608.1 | Cry1Aa12                    | 100.0    | Cry1Aa3                         | 100.00   | Cry1Aa3                     | 100.00   | Cry1Aa12                             | 100.0    |
| AEA19609.1 | Cry1Ia14                    | 100.0    | Cry1Ia2                         | 100.00   | Cry1Ia2                     | 100.00   | Cry1Ia10                             | 100.0    |
| AEA19615.1 | Cry2Aa1                     | 100.0    | Cry2Aa9                         | 100.00   | *                           | *        | Cry2Aa1                              | 100.0    |
| AFQ19845.1 | Cry1Aa13                    | 100.0    | Cry1Aa9                         | 100.00   | Cry1Aa9                     | 100.00   | Cry1Aa13                             | 100.0    |
| AFQ30496.1 | Cry4Ba1                     | 100.0    | Cry4Ba5                         | 100.00   | cry4Ba                      | 100.00   | Cry4Ba                               | 100.0    |
| AFQ30505.1 | Cry11Aa1                    | 100.0    | Cry11Aa3                        | 100.00   | *                           | *        | Cry11Aa1                             | 100.0    |
| AFQ30558.1 | Cry4Aa2                     | 100.0    | Cry4Aa4                         | 100.00   | Cry4Aa4                     | 100.00   | Cry4Aa2                              | 100.0    |
| AFQ30560.1 | Cry10Aa3                    | 100.0    | Cry10Aa4                        | 100.00   | Cry10Aa4                    | 100.00   | Cry10Aa3                             | 100.0    |
| AFU17214.1 | Cry69Aa2                    | 100.0    | Cry43Ba1                        | 38.18    | Cry7Da1                     | 32.45    | Cry4Ba                               | 37.8     |
| AFU17297.1 | Cry54Aa1                    | 100.0    | Cry54Aa1                        | 100.00   | Cry54Aa1                    | 100.00   | Cry54Aa1                             | 100.0    |
| AFU17323.1 | Cry68Aa1                    | 99.9     | Cry24Ba1                        | 31.68    | Cry9Aa2                     | 36.17    | Cry9Aa1                              | 32.6     |
| AFU17333.1 | Cry30Fa1                    | 98.8     | Cry30Fa1                        | 98.84    | Cry30Fa1                    | 99.15    | Cry30Fa1                             | 98.8     |
| AFU17344.1 | Cry54Aa1                    | 88.1     | Cry54Aa1                        | 84.47    | Cry54Aa1                    | 84.00    | Cry54Aa1                             | 88.1     |
| AFU17354.1 | Cry53Ab1                    | 99.7     | Cry53Ab1                        | 99.70    | Cry53Ab1                    | 100.00   | Cry53Ab1                             | 99.7     |
| AFU16949.1 | Cry69Aa1                    | 100.0    | Cry4Ba5                         | 38.98    | Cry7Da1                     | 32.45    | Cry4Ba                               | 39.2     |
| AFU17015.1 | Cry4Cc1                     | 99.4     | Cry4Cc1                         | 99.39    | Cry4Cc1                     | 98.92    | Cry4Cc1                              | 99.4     |
| AFU17024.1 | Cry70Ba1                    | 98.6     | Cry31Aa6-like                   | 66.10    | *                           | *        | Cry31Aa6-like                        | 64.9     |

|            |          |       |          |        |          |        |          |       |
|------------|----------|-------|----------|--------|----------|--------|----------|-------|
| AGE81486.1 | Cry1Ac10 | 100.0 | Cry1Ac9  | 100.00 | Cry1Ac9  | 100.00 | Cry1Ac1  | 100.0 |
| AGG04729.1 | Cry1Ba1  | 99.9  | Cry1Ba5  | 99.92  | Cry1Ba5  | 100.00 | Cry1Ba1  | 99.9  |
| AGG05318.1 | Cry2Ab16 | 100.0 | Cry2Ab3  | 100.00 | *        | *      | Cry2Ab1  | 100.0 |
| AGG05325.1 | Cry1Aa12 | 100.0 | Cry1Aa3  | 100.00 | Cry1Aa3  | 100.00 | Cry1Aa12 | 100.0 |
| AGG05326.1 | Cry1Ia14 | 100.0 | Cry1Ia2  | 100.00 | Cry1Ia2  | 100.00 | Cry1Ia10 | 100.0 |
| AGG05333.1 | Cry2Aa1  | 100.0 | Cry2Aa9  | 100.00 | *        | *      | Cry2Aa1  | 100.0 |
| AGG04467.1 | Cry1Ab21 | 100.0 | Cry1Ab21 | 100.00 | Cry1Ab21 | 100.00 | Cry1Ab21 | 100.0 |
| ERH96459.1 | Cry1Aa12 | 100.0 | Cry1Aa3  | 100.00 | Cry1Aa3  | 100.00 | Cry1Aa12 | 100.0 |
| ERH97545.1 | Cry2Ab16 | 100.0 | Cry2Ab3  | 100.00 | *        | *      | Cry2Ab1  | 100.0 |
| ERH97550.1 | Cry1Ba1  | 99.8  | Cry1Ba5  | 99.84  | Cry1Ba5  | 100.00 | Cry1Ba1  | 99.8  |
| ERH97551.1 | Cry1Ia14 | 100.0 | Cry1Ia2  | 100.00 | Cry1Ia2  | 100.00 | Cry1Ia10 | 100.0 |
| ERH97558.1 | Cry2Aa1  | 100.0 | Cry2Aa9  | 100.00 | *        | *      | Cry2Aa1  | 100.0 |
| ETE89313.1 | Cry2Ab16 | 100.0 | Cry2Ab3  | 100.00 | *        | *      | Cry2Ab1  | 100.0 |
| ETE91940.1 | Cry1Da1  | 100.0 | Cry1Da2  | 100.00 | Cry1Da2  | 100.00 | Cry1Da1  | 100.0 |
| ETE91952.1 | Cry1Ia14 | 100.0 | Cry1Ia2  | 100.00 | Cry1Ia2  | 100.00 | Cry1Ia10 | 100.0 |
| ETE96065.1 | Cry9Ea1  | 100.0 | Cry9Ea2  | 100.00 | Cry9Ea2  | 100.00 | Cry9Ea1  | 100.0 |
| ETE88270.1 | Cry1Fa1  | 100.0 | Cry1Fa2  | 100.00 | Cry1Fa2  | 100.00 | Cry1Fa1  | 100.0 |
| ETE89765.1 | Cry1Ia7  | 100.0 | Cry1Ia7  | 100.00 | Cry1Ia7  | 100.00 | Cry1Ia7  | 100.0 |
| ETE89897.1 | Cry1Da1  | 100.0 | Cry1Da2  | 100.00 | Cry1Da2  | 100.00 | Cry1Da1  | 100.0 |
| ETE93019.1 | Cry9Ea1  | 100.0 | Cry9Ea2  | 100.00 | Cry9Ea2  | 100.00 | Cry9Ea1  | 100.0 |
| ETE96169.1 | Cry1Ca8  | 97.8  | Cry1Ca9  | 97.82  | Cry1Ca9  | 100.00 | Cry1Ca7  | 97.8  |
| ETF00019.1 | Cry1Aa12 | 95.9  | —        | —      | *        | *      | Cry1Aa12 | 95.9  |
| AHA70031.1 | Cry5Ba2  | 100.0 | Cry5Ba2  | 100.00 | *        | *      | Cry5Ba2  | 100.0 |
| CDN39519.1 | Cry21Fa1 | 100.0 | Cry21Ba1 | 53.58  | *        | *      | Cry21Aa2 | 53.6  |
| CDN39777.1 | Cry21Ha1 | 100.0 | Cry21Ba1 | 45.87  | *        | *      | Cry21Ba1 | 45.9  |
| EXY04803.1 | Cry1Bd1  | 99.9  | Cry1Bd1  | 99.92  | Cry1Bd1  | 100.00 | Cry1Bd1  | 99.9  |
| EXY04555.1 | Cry1Ab35 | 100.0 | Cry1Ab18 | 97.70  | Cry1Ab5  | 100.00 | Cry1Ab18 | 97.4  |
| EXY04526.1 | Cry1Cb1  | 100.0 | Cry1Cb2  | 100.00 | Cry1Cb2  | 100.00 | Cry1Cb2  | 100.0 |
| EXY04520.1 | Cry1Ga1  | 100.0 | Cry1Ga1  | 100.00 | Cry1Ga1  | 100.00 | Cry1Ga1  | 100.0 |
| EXY04476.1 | Cry9Aa1  | 100.0 | Cry9Aa1  | 100.00 | Cry9Aa1  | 100.00 | Cry9Aa1  | 100.0 |
| EXY04468.1 | Cry1Gb2  | 99.9  | Cry1Gb2  | 99.91  | Cry1Gb2  | 100.00 | Cry1Gb2  | 99.9  |
| EXY05450.1 | Cry1Ib7  | 99.9  | Cry1Ib3  | 99.86  | Cry1Ib3  | 100.00 | Cry1Ib3  | 99.9  |
| EXY05451.1 | Cry1Db1  | 100.0 | Cry1Db1  | 100.00 | Cry1Db2  | 100.00 | Cry1Db1  | 100.0 |
| EXY05452.1 | Cry1Fb1  | 100.0 | Cry1Fb5  | 100.00 | Cry1Fb2  | 100.00 | Cry1Fb1  | 100.0 |
| EXY05361.1 | Cry2Ac6  | 100.0 | Cry2Ac6  | 100.00 | *        | *      | Cry2Ac6  | 100.0 |
| EXY05362.1 | Cry2Ad2  | 98.1  | Cry2Ad1  | 99.82  | *        | *      | Cry2Ad2  | 98.1  |
| EXY05115.1 | Cry2Ab4  | 100.0 | Cry2Ab4  | 100.00 | *        | *      | Cry2Ab4  | 100.0 |
| AHZ54986.1 | Cry2Ab16 | 100.0 | Cry2Ab3  | 100.00 | *        | *      | Cry2Ab1  | 100.0 |
| AHZ54991.1 | Cry1Aa12 | 100.0 | Cry1Aa3  | 100.00 | Cry1Aa3  | 100.00 | Cry1Aa12 | 100.0 |
| AHZ54992.1 | Cry1Ia14 | 100.0 | Cry1Ia2  | 100.00 | Cry1Ia2  | 100.00 | Cry1Ia10 | 100.0 |
| AHZ54998.1 | Cry2Aa1  | 100.0 | Cry2Aa9  | 100.00 | *        | *      | Cry2Aa1  | 100.0 |
| AHZ55258.1 | Cry1Ac4  | 100.0 | Cry1Ac4  | 100.00 | Cry1Ac4  | 100.00 | Cry1Ac4  | 100.0 |
| KEH48722.1 | Cry1Ac20 | 100.0 | Cry1Ac5  | 100.00 | Cry1Ac32 | 100.00 | Cry1Ac17 | 100.0 |
| KEH48187.1 | Cry1Ia14 | 100.0 | Cry1Ia2  | 100.00 | Cry1Ia2  | 100.00 | Cry1Ia10 | 100.0 |
| KEH48195.1 | Cry2Aa1  | 100.0 | Cry2Aa9  | 100.00 | *        | *      | Cry2Aa1  | 100.0 |
| KEH48048.1 | Cry2Ab16 | 100.0 | Cry2Ab3  | 100.00 | *        | *      | Cry2Ab1  | 100.0 |
| KEH45261.1 | Cry1Ab12 | 100.0 | Cry1Ab9  | 100.00 | Cry1Ab5  | 100.00 | Cry1Ab1  | 100.0 |
| AIE37434.1 | Cry2Ab16 | 99.8  | Cry2Ab3  | 99.84  | *        | *      | Cry2Ab1  | 99.8  |
| AIE37439.1 | Cry1Aa11 | 99.9  | Cry1Aa8  | 99.91  | Cry1Aa5  | 100.00 | Cry1Aa11 | 99.9  |
| AIE37440.1 | Cry1Ia14 | 100.0 | Cry1Ia2  | 100.00 | Cry1Ia2  | 100.00 | Cry1Ia10 | 100.0 |
| AIE37446.1 | Cry2Aa1  | 99.4  | Cry2Aa9  | 99.37  | *        | *      | Cry2Aa1  | 99.4  |
| AIE37011.1 | Cry1Ab12 | 100.0 | Cry1Ab9  | 100.00 | Cry1Ab5  | 100.00 | Cry1Ab1  | 100.0 |
| AIE37211.1 | Cry1Ac5  | 100.0 | Cry1Ac5  | 100.00 | Cry1Ac32 | 100.00 | Cry1Ac17 | 100.0 |
| AIM34735.1 | Cry2Ab16 | 100.0 | Cry2Ab3  | 100.00 | *        | *      | Cry2Ab1  | 100.0 |
| AIM34741.1 | Cry1Aa12 | 100.0 | Cry1Aa3  | 100.00 | Cry1Aa3  | 100.00 | Cry1Aa12 | 100.0 |
| AIM34742.1 | Cry1Ia14 | 100.0 | Cry1Ia2  | 100.00 | Cry1Ia2  | 100.00 | Cry1Ia10 | 100.0 |
| AIM34751.1 | Cry2Aa1  | 100.0 | Cry2Aa9  | 100.00 | *        | *      | Cry2Aa1  | 100.0 |
| AIM34400.1 | Cry1Ac4  | 100.0 | Cry1Ac4  | 100.00 | Cry1Ac4  | 100.00 | Cry1Ac4  | 100.0 |

|            |          |       |               |        |          |        |               |       |
|------------|----------|-------|---------------|--------|----------|--------|---------------|-------|
| AIM34414.1 | Cry1Ac4  | 100.0 | Cry1Ac4       | 100.00 | Cry1Ac4  | 100.00 | Cry1Ac4       | 100.0 |
| ALL21863.1 | Cry7Gd1  | 100.0 | Cry7Ba1       | 60.94  | Cry61Aa3 | 42.36  | Cry7Ba1       | 61.0  |
| ALL25005.1 | Cry7Cb1  | 100.0 | Cry7Ca1       | 75.58  | Cry7Ca1  | 63.82  | Cry7Ca1       | 74.4  |
| ALL21966.1 | Cry7Ea2  | 100.0 | Cry7Ea3       | 100.00 | Cry7Ea3  | 100.00 | Cry7Ea3       | 100.0 |
| ALL21973.1 | Cry67Aa2 | 100.0 | Cry67Aa2      | 100.00 | Cry67Aa2 | 100.00 | Cry67Aa2      | 100.0 |
| ALL21979.1 | Cry7Fa2  | 99.9  | Cry7Fa2       | 99.91  | Cry7Fa2  | 100.00 | Cry7Fa2       | 99.9  |
| ALL21984.1 | Cry61Aa3 | 100.0 | Cry61Aa3      | 100.00 | Cry61Aa3 | 100.00 | Cry61Aa3      | 100.0 |
| ALL11724.1 | Cry7Gd1  | 100.0 | –             | –      | Cry61Aa3 | 42.36  | Cry7Ba1       | 61.0  |
| ALL11871.1 | Cry7Cb1  | 100.0 | –             | –      | Cry7Ca1  | 63.82  | Cry7Ca1       | 74.4  |
| ALL11828.1 | Cry7Ea2  | 100.0 | Cry7Ea3       | 100.00 | Cry7Ea3  | 100.00 | Cry7Ea3       | 100.0 |
| ALL11835.1 | Cry67Aa2 | 100.0 | Cry67Aa2      | 100.00 | Cry67Aa2 | 100.00 | Cry67Aa2      | 100.0 |
| ALL11841.1 | Cry7Fa2  | 99.9  | Cry7Fa2       | 99.91  | Cry7Fa2  | 100.00 | Cry7Fa2       | 99.9  |
| ALL11846.1 | Cry61Aa3 | 100.0 | Cry61Aa3      | 100.00 | Cry61Aa3 | 100.00 | Cry61Aa3      | 100.0 |
| AJA23643.1 | Cry1Ac10 | 100.0 | Cry1Ac9       | 100.00 | Cry1Ac9  | 100.00 | Cry1Ac1       | 100.0 |
| AJA23501.1 | Cry2Ab16 | 100.0 | Cry2Ab3       | 100.00 | *        | *      | Cry2Ab1       | 100.0 |
| AJA23506.1 | Cry1Aa12 | 100.0 | Cry1Aa3       | 100.00 | Cry1Aa3  | 100.00 | Cry1Aa12      | 100.0 |
| AJA23507.1 | Cry1Ia14 | 100.0 | Cry1Ia2       | 100.00 | Cry1Ia2  | 100.00 | Cry1Ia10      | 100.0 |
| AJA23511.1 | Cry9Ea1  | 100.0 | Cry9Ea2       | 100.00 | Cry9Ea2  | 100.00 | Cry9Ea1       | 100.0 |
| AJA23086.1 | Cry1Ca8  | 100.0 | Cry1Ca9       | 100.00 | Cry1Ca9  | 100.00 | Cry1Ca7       | 100.0 |
| AJA23088.1 | Cry1Da1  | 100.0 | Cry1Da2       | 100.00 | Cry1Da2  | 100.00 | Cry1Da1       | 100.0 |
| KIP24267.1 | Cry1Ka1  | 98.4  | Cry1Ka1       | 99.09  | Cry1Ka1  | 98.94  | Cry1Ka1       | 98.4  |
| KIP24195.1 | Cry1Ib11 | 99.9  | Cry1Ib9       | 98.75  | Cry1Ib6  | 100.00 | Cry1Ib10      | 98.7  |
| AJK38183.1 | Cry1Ac5  | 100.0 | Cry1Ac5       | 100.00 | Cry1Ac32 | 100.00 | Cry1Ac17      | 100.0 |
| AJK37985.1 | Cry2Aa1  | 100.0 | Cry2Aa9       | 100.00 | *        | *      | Cry2Aa1       | 100.0 |
| AJK38154.1 | Cry1Ia14 | 100.0 | Cry1Ia2       | 100.00 | Cry1Ia2  | 100.00 | Cry1Ia10      | 100.0 |
| AJK37978.1 | Cry1Aa11 | 100.0 | Cry1Aa8       | 100.00 | Cry1Aa5  | 100.00 | Cry1Aa11      | 100.0 |
| AJK38083.1 | Cry2Ab16 | 100.0 | Cry2Ab3       | 100.00 | *        | *      | Cry2Ab1       | 100.0 |
| AJK38600.1 | Cry1Ab12 | 100.0 | Cry1Ab9       | 100.00 | Cry1Ab5  | 100.00 | Cry1Ab1       | 100.0 |
| KIU76094.1 | Cry65Aa2 | 99.9  | Cry65Aa2      | 99.91  | Cry65Aa2 | 100.00 | Cry65Aa2      | 99.9  |
| KIU74504.1 | Cry5Ea2  | 100.0 | Cry5Ea2       | 100.00 | *        | *      | Cry5Ea2       | 100.0 |
| KIU74325.1 | Cry5Da1  | 100.0 | Cry5Da2       | 100.00 | *        | *      | Cry5Da2       | 100.0 |
| KIU70667.1 | Cry5Ca1  | 100.0 | Cry5Ca2       | 100.00 | *        | *      | Cry5Ca2       | 100.0 |
| KKB28324.1 | Cry2Ab16 | 100.0 | Cry2Ab3       | 100.00 | *        | *      | Cry2Ab1       | 100.0 |
| KKB28329.1 | Cry1Ac10 | 100.0 | Cry1Ac9       | 100.00 | Cry1Ac9  | 100.00 | Cry1Ac1       | 100.0 |
| AKJ62760.1 | Cry1Ac5  | 100.0 | Cry1Ac5       | 100.00 | Cry1Ac32 | 100.00 | Cry1Ac17      | 100.0 |
| AKJ62786.1 | Cry2Aa1  | 100.0 | Cry2Aa9       | 100.00 | *        | *      | Cry2Aa1       | 100.0 |
| AKJ62789.1 | Cry1Ia14 | 100.0 | Cry1Ia2       | 100.00 | Cry1Ia2  | 100.00 | Cry1Ia10      | 100.0 |
| AKJ62790.1 | Cry1Aa11 | 100.0 | Cry1Aa8       | 100.00 | Cry1Aa5  | 100.00 | Cry1Aa11      | 100.0 |
| AKJ62795.1 | Cry2Ab16 | 100.0 | Cry2Ab3       | 100.00 | *        | *      | Cry2Ab1       | 100.0 |
| AKR12899.1 | Cry30Ga2 | 97.1  | Cry30Ga2      | 99.51  | Cry30Ga2 | 99.47  | Cry30Ga2      | 97.1  |
| AKR12909.1 | Cry71Aa1 | 100.0 | Cry53Ab1      | 41.52  | Cry53Ab1 | 40.73  | Cry53Ab1      | 41.4  |
| AKR12911.1 | Cry72Aa1 | 100.0 | Cry40Ba1      | 36.09  | Cry40Ba1 | 36.78  | Cry40Ba1      | 36.1  |
| AKR12921.1 | Cry70Aa1 | 99.9  | Cry31Aa6-like | 57.65  | *        | *      | Cry31Aa6-like | 57.6  |
| AKR13091.1 | Cry30Ea4 | 100.0 | Cry30Ea2      | 99.56  | Cry30Ea2 | 99.66  | Cry30Ea2      | 99.6  |
| AKR13097.1 | Cry69Ab1 | 100.0 | Cry4Cc1       | 39.35  | Cry7Da1  | 32.16  | Cry4Ba        | 39.0  |
| AKR13106.1 | Cry50Ba2 | 99.9  | Cry50Ba2      | 99.85  | Cry50Ba1 | 99.65  | Cry50Ba2      | 99.9  |
| AKR13252.1 | Cry56Aa4 | 100.0 | Cry56Aa2      | 99.85  | Cry56Aa2 | 100.00 | Cry56Aa2      | 99.8  |
| AKR13360.1 | Cry54Ba2 | 100.0 | Cry54Ba1      | 99.57  | Cry54Ba1 | 99.49  | Cry54Ba1      | 99.6  |
| AKR38906.1 | Cry7Da1  | 100.0 | Cry7Da1       | 100.00 | Cry7Da1  | 100.00 | Cry7Da1       | 100.0 |
| AKR38911.1 | Cry7Fb2  | 100.0 | Cry7Fa2       | 76.93  | Cry7Fa2  | 69.24  | Cry7Fa2       | 77.0  |
| AKR38949.1 | Cry7Ga2  | 100.0 | Cry7Da1       | 63.12  | Cry61Aa3 | 42.36  | Cry7Da1       | 63.3  |
| KQB18012.1 | Cry4Ba1  | 100.0 | –             | –      | cry4Ba   | 100.00 | Cry4Ba        | 100.0 |
| KQB17992.1 | Cry10Aa3 | 100.0 | Cry10Aa4      | 100.00 | Cry10Aa4 | 100.00 | Cry10Aa3      | 100.0 |
| KQB18067.1 | Cry11Aa1 | 100.0 | Cry11Aa3      | 100.00 | *        | *      | Cry11Aa1      | 100.0 |
| ALL62164.1 | Cry1Ac5  | 100.0 | Cry1Ac5       | 100.00 | Cry1Ac32 | 100.00 | Cry1Ac17      | 100.0 |
| ALL62189.1 | Cry2Aa1  | 100.0 | Cry2Aa9       | 100.00 | *        | *      | Cry2Aa1       | 100.0 |
| BAR87544.1 | Cry2Aa8  | 100.0 | Cry2Aa8       | 100.00 | *        | *      | Cry2Aa8       | 100.0 |
| BAR87552.1 | Cry1Ia12 | 100.0 | Cry1Ia2       | 100.00 | Cry1Ia5  | 100.00 | Cry1Ia10      | 100.0 |

|            |          |       |             |        |           |        |                   |       |
|------------|----------|-------|-------------|--------|-----------|--------|-------------------|-------|
| BAR87554.1 | Cry1Ea11 | 98.2  | Cry1Ea7     | 98.21  | Cry1Ea5   | 100.00 | Cry1Ea11          | 98.2  |
| AMR06122.1 | Cry8Ea3  | 100.0 | Cry8Ea1     | 100.00 | Cry8Ea1   | 100.00 | Cry8Ea1           | 100.0 |
| AMR06151.1 | Cry8Ab1  | 80.0  | Cry8Ab1     | 80.03  | Cry8Ab1   | 80.27  | Cry8Ab1           | 80.0  |
| AMR88428.1 | Cry1Fb4  | 99.8  | Cry1Fb4     | 99.83  | Cry1Fb4   | 99.82  | Cry1Fb4           | 99.8  |
| AMR88562.1 | Cry1Hb1  | 100.0 | Cry1Hb1     | 100.00 | Cry1Hb1   | 100.00 | Cry1Hb1           | 100.0 |
| AMR88563.1 | Cry1Bb1  | 99.9  | Cry1Bb1     | 99.92  | Cry1Bc1   | 100.00 | Cry1Bb1           | 99.9  |
| AMR88565.1 | Cry1Ab18 | 100.0 | Cry1Ab18    | 100.00 | Cry1Ab18  | 100.00 | Cry1Ab18          | 100.0 |
| AMR88570.1 | Cry1Nb1  | 100.0 | –           | –      | Cry1Ca4   | 52.73  | PesticidalProtein | 100.0 |
| AMR88574.1 | Cry1Ja2  | 100.0 | Cry1Ja1     | 99.57  | Cry1Ja1   | 99.09  | Cry1Ja1           | 99.6  |
| AMR88576.1 | Cry1Id1  | 100.0 | Cry1Id1     | 100.00 | Cry1Id1   | 100.00 | Cry1Id1           | 100.0 |
| AMR88578.1 | Cry1Da3  | 99.9  | Cry1Da2     | 96.82  | Cry1Da2   | 99.82  | Cry1Da1           | 96.8  |
| AMR88604.1 | Cry2Ad1  | 100.0 | Cry2Ad1     | 100.00 | *         | *      | Cry2Ad1           | 100.0 |
| AND11132.1 | Cry2Ab16 | 100.0 | Cry2Ab3     | 100.00 | *         | *      | Cry2Ab1           | 100.0 |
| AND11141.1 | Cry1Ae1  | 99.9  | Cry1Ae1     | 99.92  | Cry1Ae1   | 100.00 | Cry1Ae1           | 99.9  |
| ANS46158.1 | Cry13Aa1 | 100.0 | Cry13Aa1    | 100.00 | Cry13Aa1  | 100.00 | Cry13Aa1          | 100.0 |
| ANS46780.1 | Cry13Aa1 | 50.1  | Cry13Aa1    | 51.82  | *         | *      | Cry13Aa1          | 50.1  |
| ANS50148.1 | Cry13Aa1 | 87.1  | Cry13Aa1    | 87.06  | Cry13Aa1  | 100.00 | Cry13Aa1          | 87.1  |
| AOM14729.1 | Cry21Ca2 | 37.1  | Cry21Ba1    | 36.22  | *         | *      | Cry21Ba1          | 34.5  |
| OIX12409.1 | Cry9Ea1  | 100.0 | Cry9Ea2     | 100.00 | Cry9Ea2   | 100.00 | Cry9Ea1           | 100.0 |
| OIX18506.1 | Cry1Ca8  | 100.0 | Cry1Ca9     | 100.00 | Cry1Ca9   | 100.00 | Cry1Ca7           | 100.0 |
| OIX18511.1 | Cry1Ia14 | 100.0 | Cry1Ia2     | 100.00 | Cry1Ia2   | 100.00 | Cry1Ia10          | 100.0 |
| OIX15228.1 | Cry2Ab16 | 100.0 | Cry2Ab3     | 100.00 | *         | *      | Cry2Ab1           | 100.0 |
| OIX23464.1 | Cry1Ia14 | 100.0 | Cry1Ia2     | 100.00 | Cry1Ia2   | 100.00 | Cry1Ia10          | 100.0 |
| OIX23467.1 | Cry2Aa1  | 100.0 | Cry2Aa9     | 100.00 | *         | *      | Cry2Aa1           | 100.0 |
| OIX21407.1 | Cry2Ab16 | 100.0 | Cry2Ab3     | 100.00 | *         | *      | Cry2Ab1           | 100.0 |
| OMH24296.1 | Cry8Pa2  | 100.0 | Cry8Ba1     | 68.40  | Cry8Ba1   | 65.58  | Cry8Ba1           | 68.6  |
| OMH23709.1 | Cry8Qa1  | 100.0 | Cry8Fa1     | 67.14  | Cry8Fa1   | 63.50  | Cry8Fa1           | 67.1  |
| OMH24237.1 | Cry8Kb1  | 100.0 | Cry8Kb      | 100.00 | Cry8Ka2   | 82.87  | Cry8Kb            | 100.0 |
| AQY42679.1 | Cry1Ab34 | 100.0 | –           | –      | Cry1Ab5   | 96.60  | Cry1Ab18          | 95.4  |
| AQY42680.1 | Cry1Ia14 | 99.2  | Cry1Ia2     | 99.17  | Cry1Ia2   | 99.12  | Cry1Ia10          | 99.2  |
| AQY42687.1 | Cry1Bd2  | 99.8  | Cry1Bd2     | 99.84  | Cry1Bd1   | 100.00 | Cry1Bd2           | 99.8  |
| ARP61632.1 | Cry1Ba1  | 99.9  | Cry1Ba5     | 99.92  | Cry1Ba5   | 100.00 | Cry1Ba1           | 99.9  |
| ARP61819.1 | Cry1Ab12 | 100.0 | Cry1Ab9     | 100.00 | Cry1Ab5   | 100.00 | Cry1Ab1           | 100.0 |
| OTW73736.1 | Cry1Bd1  | 99.9  | Cry1Bd1     | 99.92  | Cry1Bd1   | 100.00 | Cry1Bd1           | 99.9  |
| OTW73398.1 | Cry9Ba2  | 99.4  | Cry9Ba-like | 100.00 | Cry9Ba2   | 100.00 | Cry9Ba-like       | 100.0 |
| OTW63083.1 | Cry2Ab4  | 96.7  | Cry2Ab4     | 96.68  | *         | *      | Cry2Ab4           | 96.7  |
| OTW61456.1 | Cry2Ab4  | 98.6  | Cry2Ab4     | 98.58  | *         | *      | Cry2Ab4           | 98.6  |
| OTW56025.1 | Cry1Ga1  | 100.0 | Cry1Ga1     | 100.00 | Cry1Ga1   | 100.00 | Cry1Ga1           | 100.0 |
| OTW54288.1 | Cry9Aa1  | 100.0 | Cry9Aa1     | 100.00 | Cry9Aa1   | 100.00 | Cry9Aa1           | 100.0 |
| OTW53899.1 | Cry1Cb1  | 100.0 | Cry1Cb2     | 100.00 | Cry1Cb2   | 100.00 | Cry1Cb2           | 100.0 |
| OTW53896.1 | Cry1Gb2  | 99.8  | Cry1Gb2     | 99.83  | Cry1Gb2   | 100.00 | Cry1Gb2           | 99.8  |
| OTW51791.1 | Cry1Db1  | 100.0 | Cry1Db2     | 100.00 | Cry1Db2   | 100.00 | Cry1Db1           | 100.0 |
| OTW51792.1 | Cry1Fb1  | 100.0 | Cry1Fb5     | 100.00 | Cry1Fb2   | 100.00 | Cry1Fb1           | 100.0 |
| OTW51788.1 | Cry1Ab35 | 99.6  | Cry1Ab18    | 98.94  | Cry1Ab5   | 100.00 | Cry1Ab18          | 98.9  |
| OTW51776.1 | Cry1Ib7  | 99.9  | Cry1Ib3     | 99.86  | Cry1Ib3   | 100.00 | Cry1Ib3           | 99.9  |
| OTW47541.1 | Cry2Ac6  | 100.0 | Cry2Ac6     | 100.00 | *         | *      | Cry2Ac6           | 100.0 |
| OTW46212.1 | Cry7Ab4  | 99.8  | Cry7Ab4     | 99.82  | Cry7Ab4   | 100.00 | Cry7Ab4           | 99.8  |
| OTW42787.1 | Cry1Ba1  | 99.9  | Cry1Ba5     | 99.92  | Cry1Ba5   | 100.00 | Cry1Ba1           | 99.9  |
| OTW70091.1 | Cry21Fa1 | 31.0  | Cry21Ba1    | 32.58  | *         | *      | Cry5Ca2           | 34.0  |
| OTW62068.1 | Cry21Fa1 | 31.0  | –           | –      | *         | *      | Cry5Ca2           | 34.0  |
| OTW93738.1 | Cry9Aa4  | 99.9  | Cry9Aa1     | 97.99  | Cry9Aa1   | 99.66  | Cry9Aa1           | 98.0  |
| OTW87134.1 | Cry9Eb1  | 100.0 | Cry9Eb1     | 100.00 | Cry9Eb1   | 100.00 | Cry9Eb1           | 100.0 |
| OTW84856.1 | Cry9Ee2  | 99.1  | Cry9Ea-like | 100.00 | Cry9-like | 72.55  | Cry9Ea-like       | 100.0 |
| OTW84781.1 | Cry1Na1  | 100.0 | Cry1B-like  | 100.00 | Cry1Ca5   | 52.39  | Cry1B-like        | 100.0 |
| OTW84538.1 | Cry9Da1  | 100.0 | Cry9Eb-like | 100.00 | Cry9Da1   | 100.00 | Cry9Da1           | 100.0 |
| OTW81389.1 | Cry1Ie2  | 100.0 | –           | –      | Cry1Ie1   | 98.94  | Cry1Ie1           | 96.0  |
| OTX08732.1 | Cry1Na1  | 100.0 | Cry1B-like  | 100.00 | Cry1Ca5   | 52.39  | Cry1B-like        | 100.0 |
| OTX08738.1 | Cry9Aa4  | 99.8  | Cry9Aa1     | 97.66  | Cry9Aa1   | 99.66  | Cry9Aa1           | 97.7  |



|            |          |       |               |        |           |        |               |       |
|------------|----------|-------|---------------|--------|-----------|--------|---------------|-------|
| OTW94166.1 | Cry9Ee2  | 98.9  | Cry9Ea-like   | 99.02  | Cry9-like | 72.55  | Cry9Ea-like   | 99.0  |
| OTW94050.1 | Cry9Da3  | 99.7  | Cry9Eb-like   | 99.68  | Cry9Da1   | 100.00 | Cry9Eb-like   | 99.7  |
| OTW90757.1 | Cry1Ie2  | 100.0 | –             | –      | Cry1Ie1   | 98.94  | Cry1Ie1       | 96.0  |
| OTW84525.1 | Cry1Ie2  | 100.0 | –             | –      | Cry1Ie1   | 98.94  | Cry1Ie1       | 96.0  |
| OTW84402.1 | Cry1Na1  | 100.0 | Cry1B-like    | 100.00 | Cry1Ca5   | 52.39  | Cry1B-like    | 100.0 |
| OTW84346.1 | Cry9Da4  | 99.7  | Cry9Eb-like   | 100.00 | Cry9Da1   | 100.00 | Cry9Eb-like   | 100.0 |
| OTW81421.1 | Cry9Eb3  | 95.6  | Cry9Eb1       | 94.97  | Cry9Eb1   | 100.00 | Cry9Eb1       | 95.0  |
| OTX02121.1 | Cry7Ab4  | 99.8  | Cry7Ab4       | 99.82  | Cry7Ab4   | 100.00 | Cry7Ab4       | 99.8  |
| OTW70710.1 | Cry7Ba1  | 100.0 | Cry7Ba1       | 100.00 | Cry7Ba1   | 100.00 | Cry7Ba1       | 100.0 |
| OTW70715.1 | Cry7Ia1  | 100.0 | Cry7Ba1-like  | 99.91  | Cry7Ba1   | 44.29  | Cry7Ba1-like  | 99.9  |
| OTX23942.1 | Cry1Ie2  | 100.0 | –             | –      | Cry1Ie1   | 98.94  | Cry1Ie1       | 96.0  |
| OTX23531.1 | Cry9Da4  | 99.7  | Cry9Eb-like   | 100.00 | Cry9Da1   | 100.00 | Cry9Eb-like   | 100.0 |
| OTX21375.1 | Cry1Na1  | 100.0 | Cry1B-like    | 100.00 | Cry1Ca5   | 52.39  | Cry1B-like    | 100.0 |
| OTX17826.1 | Cry9Eb3  | 95.6  | –             | –      | Cry9Eb1   | 100.00 | Cry9Eb1       | 95.0  |
| OTX40985.1 | Cry1Ac2  | 99.9  | Cry1Ac2       | 99.92  | Cry1Ac2   | 100.00 | Cry1Ac2       | 99.9  |
| OTX38902.1 | Cry2Ab4  | 100.0 | Cry2Ab4       | 100.00 | *         | *      | Cry2Ab4       | 100.0 |
| OTX17809.1 | Cry1Ia14 | 99.6  | Cry1Ia2       | 99.58  | Cry1Ia2   | 99.47  | Cry1Ia10      | 99.6  |
| OTX17812.1 | Cry2Aa1  | 100.0 | Cry2Aa9       | 100.00 | *         | *      | Cry2Aa1       | 100.0 |
| OTX56884.1 | Cry7Ba1  | 100.0 | Cry7Ba1       | 100.00 | Cry7Ba1   | 100.00 | Cry7Ba1       | 100.0 |
| OTX56889.1 | Cry7Ia1  | 100.0 | Cry7Ba1-like  | 99.91  | Cry7Ba1   | 44.29  | Cry7Ba1-like  | 99.9  |
| OTX78579.1 | Cry4Aa2  | 100.0 | Cry4Aa4       | 100.00 | Cry4Aa4   | 100.00 | Cry4Aa2       | 100.0 |
| OTX77086.1 | Cry10Aa3 | 100.0 | Cry10Aa4      | 100.00 | Cry10Aa4  | 100.00 | Cry10Aa3      | 100.0 |
| OTX69600.1 | Cry4Ba1  | 100.0 | –             | –      | cry4Ba    | 100.00 | Cry4Ba        | 100.0 |
| OTX69582.1 | Cry11Aa1 | 100.0 | Cry11Aa3      | 100.00 | *         | *      | Cry11Aa1      | 100.0 |
| OTX77050.1 | Cry28Aa2 | 99.7  | Cry28Aa2      | 99.73  | Cry28Aa2  | 99.47  | Cry28Aa2      | 99.7  |
| OTX75968.1 | Cry26Aa1 | 95.5  | –             | –      | Cry26Aa1  | 100.00 | Cry26Aa1      | 95.5  |
| OTX71618.1 | Cry28Aa2 | 99.7  | Cry28Aa2      | 99.73  | Cry28Aa2  | 99.47  | Cry28Aa2      | 99.7  |
| OTX71525.1 | Cry28Aa2 | 99.7  | Cry28Aa2      | 99.73  | Cry28Aa2  | 99.47  | Cry28Aa2      | 99.7  |
| OTX71494.1 | Cry7Ba1  | 100.0 | Cry7Ba1       | 100.00 | Cry7Ba1   | 100.00 | Cry7Ba1       | 100.0 |
| OTX71499.1 | Cry7Ia1  | 100.0 | Cry7Ba1-like  | 99.91  | Cry7Ba1   | 44.29  | Cry7Ba1-like  | 99.9  |
| OTY10661.1 | Cry7Ka1  | 100.0 | Cry7Ab4       | 67.84  | Cry7Ab4   | 54.27  | Cry7Ab4       | 67.8  |
| OTY00887.1 | Cry7Cb1  | 60.4  | Cry7Ba1       | 57.07  | Cry8Db1   | 31.97  | Cry7Ba1       | 57.2  |
| OTY00858.1 | Cry7Gc1  | 99.8  | Cry7Ba1       | 59.77  | Cry61Aa3  | 43.06  | Cry7Ba1       | 59.8  |
| OTY42695.1 | Cry3Aa1  | 100.0 | Cry3Aa7       | 100.00 | Cry3Aa7   | 100.00 | Cry3Aa1       | 100.0 |
| OTY31851.1 | Cry28Aa2 | 99.7  | Cry28Aa2      | 99.73  | Cry28Aa2  | 99.47  | Cry28Aa2      | 99.7  |
| OTY27002.1 | Cry7Ba1  | 100.0 | Cry7Ba1       | 100.00 | Cry7Ba1   | 100.00 | Cry7Ba1       | 100.0 |
| OTY27007.1 | Cry7Ia1  | 100.0 | Cry7Ba1-like  | 99.91  | Cry7Ba1   | 44.29  | Cry7Ba1-like  | 99.9  |
| OTY48305.1 | Cry8Ac1  | 100.0 | Cry8Ab1-like  | 100.00 | Cry8Ab1   | 74.96  | Cry8Ab1-like  | 100.0 |
| OTY48272.1 | Cry8Ac1  | 100.0 | Cry8Ab1-like  | 100.00 | Cry8Ab1   | 74.96  | Cry8Ab1-like  | 100.0 |
| OTY48296.1 | Cry8Ac1  | 100.0 | Cry8Ab1-like  | 100.00 | Cry8Ab1   | 74.96  | Cry8Ab1-like  | 100.0 |
| OTY42322.1 | Cry8Ac1  | 100.0 | Cry8Ab1-like  | 100.00 | Cry8Ab1   | 74.96  | Cry8Ab1-like  | 100.0 |
| OTY44027.1 | Cry2Ab16 | 100.0 | Cry2Ab3       | 100.00 | *         | *      | Cry2Ab1       | 100.0 |
| OTY60291.1 | Cry21Da1 | 100.0 | Cry21Ba2-like | 100.00 | *         | *      | Cry21Ba2-like | 100.0 |
| OTY57628.1 | Cry21Fa1 | 47.3  | Cry21Ba2-like | 47.95  | *         | *      | Cry21Ba2-like | 46.7  |
| OTY55646.1 | Cry21Ca2 | 100.0 | Cry21Ba1      | 52.90  | *         | *      | Cry21Ba1      | 53.2  |
| OTY74981.1 | Cry8Ta1  | 100.0 | Cry8Ia1       | 59.98  | Cry8Da3   | 50.42  | Cry8Da2       | 58.8  |
| OTY74274.1 | Cry8Ma3  | 100.0 | Cry8-like     | 100.00 | Cry8Ma2   | 100.00 | Cry8-like     | 100.0 |
| OTY74147.1 | Cry8Ia4  | 100.0 | Cry8Ia1       | 99.50  | Cry8Ia1   | 99.13  | Cry8Ia1       | 99.5  |
| OTY85625.1 | Cry1Ba2  | 99.9  | Cry1Ba4       | 99.92  | Cry1Ba4   | 100.00 | Cry1Ba2       | 99.9  |
| OTX53140.1 | Cry7Ia1  | 100.0 | Cry7Ba1-like  | 99.91  | Cry7Ba1   | 44.29  | Cry7Ba1-like  | 99.9  |
| OTX53145.1 | Cry7Ba1  | 100.0 | Cry7Ba1       | 100.00 | Cry7Ba1   | 100.00 | Cry7Ba1       | 100.0 |
| OTX96001.1 | Cry8Pa2  | 100.0 | Cry8Ba1       | 71.20  | Cry8Ba1   | 65.58  | Cry8Ba1       | 71.2  |
| OTX94785.1 | Cry8Qa1  | 100.0 | Cry8Fa1       | 69.83  | Cry8Fa1   | 63.50  | Cry8Fa1       | 69.8  |
| OTX85968.1 | Cry8Kb1  | 100.0 | Cry8Kb        | 100.00 | Cry8Ka2   | 82.87  | Cry8Kb        | 100.0 |
| OTY77561.1 | Cry1Bd1  | 99.9  | Cry1Bd1       | 99.92  | Cry1Bd1   | 100.00 | Cry1Bd1       | 99.9  |
| OTY74986.1 | Cry1Ib7  | 99.9  | Cry1Ib3       | 99.86  | Cry1Ib3   | 100.00 | Cry1Ib3       | 99.9  |
| OTY64265.1 | Cry2Ac6  | 100.0 | Cry2Ac6       | 100.00 | *         | *      | Cry2Ac6       | 100.0 |
| OTY63536.1 | Cry1Db1  | 100.0 | Cry1Db2       | 100.00 | Cry1Db2   | 100.00 | Cry1Db1       | 100.0 |

|            |          |       |             |        |          |        |                   |       |
|------------|----------|-------|-------------|--------|----------|--------|-------------------|-------|
| OTY63537.1 | Cry1Fb1  | 100.0 | Cry1Fb5     | 100.00 | Cry1Fb2  | 100.00 | Cry1Fb1           | 100.0 |
| OTY56302.1 | Cry9Ba2  | 99.6  | Cry9Ba-like | 99.82  | Cry9Ba2  | 100.00 | Cry9Ba-like       | 99.8  |
| OTY56301.1 | Cry9Aa1  | 99.8  | Cry9Aa1     | 99.83  | Cry9Aa1  | 100.00 | Cry9Aa1           | 99.8  |
| OTY56195.1 | Cry1Gb2  | 99.9  | Cry1Gb2     | 99.91  | Cry1Gb2  | 100.00 | Cry1Gb2           | 99.9  |
| OTY54786.1 | Cry1Ab35 | 100.0 | Cry1Ab18    | 99.11  | Cry1Ab5  | 100.00 | Cry1Ab18          | 99.1  |
| OTY50446.1 | Cry2Ab4  | 98.6  | Cry2Ab4     | 98.58  | *        | *      | Cry2Ab4           | 98.6  |
| OTY50443.1 | Cry1Cb1  | 100.0 | Cry1Cb2     | 100.00 | Cry1Cb2  | 100.00 | Cry1Cb2           | 100.0 |
| OTY50440.1 | Cry2Ab4  | 96.7  | Cry2Ab4     | 96.68  | *        | *      | Cry2Ab4           | 96.7  |
| OTY50433.1 | Cry1Ga1  | 100.0 | Cry1Ga1     | 100.00 | Cry1Ga1  | 100.00 | Cry1Ga1           | 100.0 |
| OTY90981.1 | Cry1Ab35 | 99.9  | Cry1Ab18    | 97.63  | Cry1Ab5  | 100.00 | Cry1Ab18          | 97.3  |
| OTY88175.1 | Cry1Bd1  | 99.9  | Cry1Bd1     | 99.92  | Cry1Bd1  | 100.00 | Cry1Bd1           | 99.9  |
| OTY85311.1 | Cry1Ga1  | 100.0 | Cry1Ga1     | 100.00 | Cry1Ga1  | 100.00 | Cry1Ga1           | 100.0 |
| OTY84534.1 | Cry1Gb2  | 99.9  | Cry1Gb2     | 99.91  | Cry1Gb2  | 100.00 | Cry1Gb2           | 99.9  |
| OTY81209.1 | Cry9Ba2  | 99.9  | Cry9Ba-like | 100.00 | Cry9Ba2  | 100.00 | Cry9Ba-like       | 100.0 |
| OTY81129.1 | Cry1Ib7  | 99.9  | Cry1Ib3     | 99.86  | Cry1Ib3  | 100.00 | Cry1Ib3           | 99.9  |
| OTY81130.1 | Cry1Db1  | 100.0 | Cry1Db1     | 100.00 | Cry1Db2  | 100.00 | Cry1Db1           | 100.0 |
| OTY81131.1 | Cry1Fb1  | 100.0 | Cry1Fb5     | 100.00 | Cry1Fb2  | 100.00 | Cry1Fb1           | 100.0 |
| OTY81124.1 | Cry9Aa1  | 100.0 | Cry9Aa1     | 100.00 | Cry9Aa1  | 100.00 | Cry9Aa1           | 100.0 |
| OTY81076.1 | Cry2Ac6  | 100.0 | Cry2Ac6     | 100.00 | *        | *      | Cry2Ac6           | 100.0 |
| OTY80983.1 | Cry1Cb1  | 100.0 | Cry1Cb2     | 100.00 | Cry1Cb2  | 100.00 | Cry1Cb2           | 100.0 |
| OTY80916.1 | Cry2Ab4  | 100.0 | Cry2Ab4     | 100.00 | *        | *      | Cry2Ab4           | 100.0 |
| OTZ05470.1 | Cry2Ab16 | 100.0 | Cry2Ab3     | 100.00 | *        | *      | Cry2Ab1           | 100.0 |
| OTZ05476.1 | Cry1Aa12 | 100.0 | Cry1Aa3     | 100.00 | Cry1Aa3  | 100.00 | Cry1Aa12          | 100.0 |
| OTZ05477.1 | Cry1Ia14 | 100.0 | Cry1Ia2     | 100.00 | Cry1Ia2  | 100.00 | Cry1Ia10          | 100.0 |
| OTZ00150.1 | Cry1Da1  | 100.0 | Cry1Da2     | 100.00 | Cry1Da2  | 100.00 | Cry1Da1           | 100.0 |
| OTZ00152.1 | Cry1Ca8  | 100.0 | Cry1Ca9     | 100.00 | Cry1Ca9  | 100.00 | Cry1Ca7           | 100.0 |
| OTY84077.1 | Cry1Ia14 | 100.0 | Cry1Ia2     | 100.00 | Cry1Ia2  | 100.00 | Cry1Ia10          | 100.0 |
| OTY83992.1 | Cry2Ab16 | 100.0 | Cry2Ab3     | 100.00 | *        | *      | Cry2Ab1           | 100.0 |
| OTY76348.1 | Cry1Ca8  | 100.0 | Cry1Ca9     | 100.00 | Cry1Ca9  | 100.00 | Cry1Ca7           | 100.0 |
| OTY76350.1 | Cry1Da1  | 100.0 | Cry1Da2     | 100.00 | Cry1Da2  | 100.00 | Cry1Da1           | 100.0 |
| OTZ15274.1 | Cry1Ca8  | 100.0 | Cry1Ca9     | 100.00 | Cry1Ca9  | 100.00 | Cry1Ca7           | 100.0 |
| OTZ15276.1 | Cry1Da1  | 100.0 | Cry1Da2     | 100.00 | Cry1Da2  | 100.00 | Cry1Da1           | 100.0 |
| OTZ15087.1 | Cry1Ia14 | 100.0 | Cry1Ia2     | 100.00 | Cry1Ia2  | 100.00 | Cry1Ia10          | 100.0 |
| OTZ13168.1 | Cry2Ab16 | 100.0 | Cry2Ab3     | 100.00 | *        | *      | Cry2Ab1           | 100.0 |
| OTZ11691.1 | Cry9Ea1  | 100.0 | Cry9Ea2     | 100.00 | Cry9Ea2  | 100.00 | Cry9Ea1           | 100.0 |
| OTY98192.1 | Cry1Ia14 | 100.0 | Cry1Ia2     | 100.00 | Cry1Ia2  | 100.00 | Cry1Ia10          | 100.0 |
| OTY98193.1 | Cry1Aa12 | 100.0 | Cry1Aa3     | 100.00 | Cry1Aa3  | 100.00 | Cry1Aa12          | 100.0 |
| OTY98199.1 | Cry2Ab16 | 100.0 | Cry2Ab3     | 100.00 | *        | *      | Cry2Ab1           | 100.0 |
| OTY98186.1 | Cry9Ea1  | 100.0 | Cry9Ea2     | 100.00 | Cry9Ea2  | 100.00 | Cry9Ea1           | 100.0 |
| OTZ48089.1 | Cry1Ac5  | 100.0 | Cry1Ac5     | 100.00 | Cry1Ac32 | 100.00 | Cry1Ac17          | 100.0 |
| OTZ43079.1 | Cry2Ab16 | 100.0 | Cry2Ab3     | 100.00 | *        | *      | Cry2Ab1           | 100.0 |
| OTZ38706.1 | Cry1Aa11 | 100.0 | Cry1Aa8     | 100.00 | Cry1Aa5  | 100.00 | Cry1Aa11          | 100.0 |
| OTZ20302.1 | Cry1Ia14 | 100.0 | Cry1Ia2     | 100.00 | Cry1Ia2  | 100.00 | Cry1Ia10          | 100.0 |
| OTZ20305.1 | Cry2Aa1  | 100.0 | Cry2Aa9     | 100.00 | *        | *      | Cry2Aa1           | 100.0 |
| OTZ18389.1 | Cry1Ea11 | 100.0 | Cry1Ea7     | 100.00 | Cry1Ea5  | 100.00 | Cry1Ea11          | 100.0 |
| OTZ15900.1 | Cry2Aa1  | 100.0 | Cry2Aa9     | 100.00 | *        | *      | Cry2Aa1           | 100.0 |
| OTZ15903.1 | Cry1Ia14 | 99.6  | Cry1Ia2     | 99.58  | Cry1Ia2  | 99.47  | Cry1Ia10          | 99.6  |
| OTZ14059.1 | Cry1Ac2  | 99.8  | Cry1Ac2     | 99.83  | Cry1Ac2  | 100.00 | Cry1Ac2           | 99.8  |
| OTZ58098.1 | Cry8Aa1  | 46.1  | Cry8Aa1     | 45.93  | Cry8Aa1  | 47.00  | Cry8Aa1           | 46.1  |
| OTZ54220.1 | Cry2Ad1  | 100.0 | Cry2Ad1     | 100.00 | *        | *      | Cry2Ad1           | 100.0 |
| OTZ53847.1 | Cry1Hb1  | 100.0 | Cry1Hb1     | 100.00 | Cry1Hb1  | 100.00 | Cry1Hb1           | 100.0 |
| OTZ53849.1 | Cry1Bb1  | 99.9  | Cry1Bb1     | 99.92  | Cry1Bc1  | 100.00 | Cry1Bb1           | 99.9  |
| OTZ53852.1 | Cry1Ab18 | 100.0 | Cry1Ab18    | 100.00 | Cry1Ab18 | 100.00 | Cry1Ab18          | 100.0 |
| OTZ53859.1 | Cry1Nb1  | 100.0 | –           | –      | Cry1Ca4  | 52.73  | PesticidalProtein | 100.0 |
| OTZ53864.1 | Cry1Ja2  | 100.0 | Cry1Ja1     | 99.57  | Cry1Ja1  | 99.09  | Cry1Ja1           | 99.6  |
| OTZ53867.1 | Cry1Id1  | 100.0 | Cry1Id1     | 100.00 | Cry1Id1  | 100.00 | Cry1Id1           | 100.0 |
| OTZ53868.1 | Cry1Da3  | 99.9  | Cry1Da2     | 96.82  | Cry1Da2  | 99.82  | Cry1Da1           | 96.8  |
| OTZ39194.1 | Cry1Fb4  | 99.8  | Cry1Fb4     | 99.83  | Cry1Fb4  | 99.82  | Cry1Fb4           | 99.8  |

|            |          |       |             |        |          |        |             |       |
|------------|----------|-------|-------------|--------|----------|--------|-------------|-------|
| OTZ32741.1 | Cry1Ka2  | 99.8  | Cry1Ka1     | 98.99  | Cry1Ka1  | 98.58  | Cry1Ka1     | 98.2  |
| OTZ30763.1 | Cry2Ad1  | 100.0 | Cry2Ad1     | 100.00 | *        | *      | Cry2Ad1     | 100.0 |
| OTZ30108.1 | Cry1Hb1  | 100.0 | Cry1Hb1     | 100.00 | Cry1Hb1  | 100.00 | Cry1Hb1     | 100.0 |
| OTZ30110.1 | Cry1Bb1  | 99.9  | Cry1Bb1     | 99.92  | Cry1Bc1  | 100.00 | Cry1Bb1     | 99.9  |
| OTZ30113.1 | Cry1Ab18 | 100.0 | Cry1Ab18    | 100.00 | Cry1Ab18 | 100.00 | Cry1Ab18    | 100.0 |
| OTZ30120.1 | Cry1Ib11 | 99.9  | Cry1Ib9     | 98.75  | Cry1Ib6  | 100.00 | Cry1Ib10    | 98.7  |
| OTZ63029.1 | Cry1Gb2  | 99.8  | Cry1Gb2     | 99.83  | Cry1Gb2  | 100.00 | Cry1Gb2     | 99.8  |
| OTZ53632.1 | Cry1Bd1  | 99.9  | Cry1Bd1     | 99.92  | Cry1Bd1  | 100.00 | Cry1Bd1     | 99.9  |
| OTZ53086.1 | Cry2Ab4  | 100.0 | Cry2Ab4     | 100.00 | *        | *      | Cry2Ab4     | 100.0 |
| OTZ52987.1 | Cry1Cb1  | 100.0 | Cry1Cb2     | 100.00 | Cry1Cb2  | 100.00 | Cry1Cb2     | 100.0 |
| OTZ48347.1 | Cry1Ab35 | 99.6  | Cry1Ab18    | 98.94  | Cry1Ab5  | 100.00 | Cry1Ab18    | 98.9  |
| OTZ47101.1 | Cry9Aa1  | 99.5  | Cry9Aa1     | 99.48  | Cry9Aa1  | 100.00 | Cry9Aa1     | 99.5  |
| OTZ46996.1 | Cry9Ba2  | 99.9  | Cry9Ba-like | 100.00 | Cry9Ba2  | 100.00 | Cry9Ba-like | 100.0 |
| OTZ46390.1 | Cry1Ga1  | 100.0 | Cry1Ga1     | 100.00 | Cry1Ga1  | 100.00 | Cry1Ga1     | 100.0 |
| OTZ46143.1 | Cry2Ab4  | 98.1  | Cry2Ab4     | 98.10  | *        | *      | Cry2Ab4     | 98.1  |
| OTZ43629.1 | Cry1Db1  | 100.0 | Cry1Db2     | 100.00 | Cry1Db2  | 100.00 | Cry1Db1     | 100.0 |
| OTZ43630.1 | Cry1Fb1  | 100.0 | Cry1Fb5     | 100.00 | Cry1Fb2  | 100.00 | Cry1Fb1     | 100.0 |
| OTZ43567.1 | Cry1Ib7  | 99.9  | Cry1Ib3     | 99.86  | Cry1Ib3  | 100.00 | Cry1Ib3     | 99.9  |
| OTZ43161.1 | Cry2Ac6  | 100.0 | Cry2Ac6     | 100.00 | *        | *      | Cry2Ac6     | 100.0 |
| OTZ77559.1 | Cry7Ab3  | 99.8  | Cry7Ab8     | 99.82  | Cry7Ab8  | 99.64  | Cry7Ab3     | 99.8  |
| OUA04284.1 | Cry2Ab16 | 100.0 | Cry2Ab3     | 100.00 | *        | *      | Cry2Ab1     | 100.0 |
| OUA02994.1 | Cry1Ia14 | 100.0 | Cry1Ia2     | 100.00 | Cry1Ia2  | 100.00 | Cry1Ia10    | 100.0 |
| OTZ94741.1 | Cry1Ac10 | 100.0 | Cry1Ac9     | 100.00 | Cry1Ac9  | 100.00 | Cry1Ac1     | 100.0 |
| OTZ93984.1 | Cry1Aa12 | 100.0 | Cry1Aa3     | 100.00 | Cry1Aa3  | 100.00 | Cry1Aa12    | 100.0 |
| OTZ98517.1 | Cry1Ea11 | 100.0 | Cry1Ea7     | 100.00 | Cry1Ea5  | 100.00 | Cry1Ea11    | 100.0 |
| OUA02427.1 | Cry1Ea11 | 100.0 | Cry1Ea7     | 100.00 | Cry1Ea5  | 100.00 | Cry1Ea11    | 100.0 |
| OTZ97385.1 | Cry1Ac2  | 99.8  | Cry1Ac2     | 99.83  | Cry1Ac2  | 100.00 | Cry1Ac2     | 99.8  |
| OTZ92959.1 | Cry1Ia14 | 99.6  | Cry1Ia2     | 99.58  | Cry1Ia2  | 99.47  | Cry1Ia10    | 99.6  |
| OTZ92962.1 | Cry2Aa1  | 100.0 | Cry2Aa9     | 100.00 | *        | *      | Cry2Aa1     | 100.0 |
| OUA19853.1 | Cry9Ea1  | 100.0 | Cry9Ea2     | 100.00 | Cry9Ea2  | 100.00 | Cry9Ea1     | 100.0 |
| OUA19157.1 | Cry2Ab16 | 100.0 | Cry2Ab3     | 100.00 | *        | *      | Cry2Ab1     | 100.0 |
| OUA19085.1 | Cry1Ia14 | 100.0 | Cry1Ia2     | 100.00 | Cry1Ia2  | 100.00 | Cry1Ia10    | 100.0 |
| OUA13599.1 | Cry1Ca8  | 100.0 | Cry1Ca9     | 100.00 | Cry1Ca9  | 100.00 | Cry1Ca7     | 100.0 |
| OUA13601.1 | Cry1Da1  | 100.0 | Cry1Da2     | 100.00 | Cry1Da2  | 100.00 | Cry1Da1     | 100.0 |
| OUA29863.1 | Cry9Ea1  | 100.0 | Cry9Ea2     | 100.00 | Cry9Ea2  | 100.00 | Cry9Ea1     | 100.0 |
| OUA23293.1 | Cry1Ac10 | 100.0 | Cry1Ac9     | 100.00 | Cry1Ac9  | 100.00 | Cry1Ac1     | 100.0 |
| OUA22636.1 | Cry1Aa12 | 100.0 | Cry1Aa3     | 100.00 | Cry1Aa3  | 100.00 | Cry1Aa12    | 100.0 |
| OUA22575.1 | Cry1Ia14 | 100.0 | Cry1Ia2     | 100.00 | Cry1Ia2  | 100.00 | Cry1Ia10    | 100.0 |
| OUA22580.1 | Cry1Ca8  | 100.0 | Cry1Ca9     | 100.00 | Cry1Ca9  | 100.00 | Cry1Ca7     | 100.0 |
| OUA22582.1 | Cry1Da1  | 99.6  | Cry1Da2     | 99.57  | Cry1Da2  | 99.08  | Cry1Da1     | 99.6  |
| OUA14469.1 | Cry2Ab16 | 100.0 | Cry2Ab3     | 100.00 | *        | *      | Cry2Ab1     | 100.0 |
| OUA21361.1 | Cry9Ea1  | 100.0 | Cry9Ea2     | 100.00 | Cry9Ea2  | 100.00 | Cry9Ea1     | 100.0 |
| OUA20993.1 | Cry2Ab16 | 100.0 | Cry2Ab3     | 100.00 | *        | *      | Cry2Ab1     | 100.0 |
| OUA20999.1 | Cry1Aa12 | 100.0 | Cry1Aa3     | 100.00 | Cry1Aa3  | 100.00 | Cry1Aa12    | 100.0 |
| OUA21000.1 | Cry1Ia14 | 100.0 | Cry1Ia2     | 100.00 | Cry1Ia2  | 100.00 | Cry1Ia10    | 100.0 |
| OUA21005.1 | Cry1Ca8  | 100.0 | Cry1Ca9     | 100.00 | Cry1Ca9  | 100.00 | Cry1Ca7     | 100.0 |
| OUA21007.1 | Cry1Da1  | 100.0 | Cry1Da2     | 100.00 | Cry1Da2  | 100.00 | Cry1Da1     | 100.0 |
| OUA49687.1 | Cry2Ab16 | 100.0 | Cry2Ab3     | 100.00 | *        | *      | Cry2Ab1     | 100.0 |
| OUA40858.1 | Cry1Ab12 | 100.0 | Cry1Ab20    | 100.00 | Cry1Ab5  | 100.00 | Cry1Ab1     | 100.0 |
| OUA40850.1 | Cry1Aa12 | 99.9  | Cry1Aa3     | 99.87  | Cry1Aa3  | 100.00 | Cry1Aa12    | 99.9  |
| OUA34007.1 | Cry1Ia14 | 100.0 | Cry1Ia2     | 100.00 | Cry1Ia2  | 100.00 | Cry1Ia10    | 100.0 |
| OUA34012.1 | Cry1Ca8  | 100.0 | Cry1Ca9     | 100.00 | Cry1Ca9  | 100.00 | Cry1Ca7     | 100.0 |
| OUA34014.1 | Cry1Da1  | 100.0 | Cry1Da2     | 100.00 | Cry1Da2  | 100.00 | Cry1Da1     | 100.0 |
| OUA38461.1 | Cry9Ea1  | 100.0 | Cry9Ea2     | 100.00 | Cry9Ea2  | 100.00 | Cry9Ea1     | 100.0 |
| OUA36885.1 | Cry1Ia14 | 100.0 | Cry1Ia2     | 100.00 | Cry1Ia2  | 100.00 | Cry1Ia10    | 100.0 |
| OUA36886.1 | Cry1Aa12 | 100.0 | Cry1Aa3     | 100.00 | Cry1Aa3  | 100.00 | Cry1Aa12    | 100.0 |
| OUA36892.1 | Cry2Ab16 | 100.0 | Cry2Ab3     | 100.00 | *        | *      | Cry2Ab1     | 100.0 |
| OUA45353.1 | Cry9Ea1  | 100.0 | Cry9Ea2     | 100.00 | Cry9Ea2  | 100.00 | Cry9Ea1     | 100.0 |

|            |          |       |               |        |          |        |               |       |
|------------|----------|-------|---------------|--------|----------|--------|---------------|-------|
| OUA40248.1 | Cry1Ab12 | 100.0 | Cry1Ab9       | 100.00 | Cry1Ab5  | 100.00 | Cry1Ab1       | 100.0 |
| OUA35577.1 | Cry1Aa12 | 99.9  | Cry1Aa3       | 99.87  | Cry1Aa3  | 100.00 | Cry1Aa12      | 99.9  |
| OUA34148.1 | Cry2Ab16 | 100.0 | Cry2Ab3       | 100.00 | *        | *      | Cry2Ab1       | 100.0 |
| OUA32933.1 | Cry1Ia14 | 100.0 | Cry1Ia2       | 100.00 | Cry1Ia2  | 100.00 | Cry1Ia10      | 100.0 |
| OUA32938.1 | Cry1Ca8  | 100.0 | Cry1Ca9       | 100.00 | Cry1Ca9  | 100.00 | Cry1Ca7       | 100.0 |
| OUA32940.1 | Cry1Da1  | 100.0 | Cry1Da2       | 100.00 | Cry1Da2  | 100.00 | Cry1Da1       | 100.0 |
| OUA82733.1 | Cry9Ea1  | 100.0 | Cry9Ea2       | 100.00 | Cry9Ea2  | 100.00 | Cry9Ea1       | 100.0 |
| OUA67399.1 | Cry2Ab16 | 100.0 | Cry2Ab3       | 100.00 | *        | *      | Cry2Ab1       | 100.0 |
| OUA67405.1 | Cry1Aa12 | 100.0 | Cry1Aa3       | 100.00 | Cry1Aa3  | 100.00 | Cry1Aa12      | 100.0 |
| OUA67406.1 | Cry1Ia14 | 100.0 | Cry1Ia2       | 100.00 | Cry1Ia2  | 100.00 | Cry1Ia10      | 100.0 |
| OUA67411.1 | Cry1Ca8  | 100.0 | Cry1Ca9       | 100.00 | Cry1Ca9  | 100.00 | Cry1Ca7       | 100.0 |
| OUA67413.1 | Cry1Da1  | 100.0 | Cry1Da2       | 100.00 | Cry1Da2  | 100.00 | Cry1Da1       | 100.0 |
| OUA77719.1 | Cry9Ea1  | 100.0 | Cry9Ea2       | 100.00 | Cry9Ea2  | 100.00 | Cry9Ea1       | 100.0 |
| OUA76906.1 | Cry2Ab16 | 100.0 | Cry2Ab3       | 100.00 | *        | *      | Cry2Ab1       | 100.0 |
| OUA76864.1 | Cry1Da1  | 100.0 | Cry1Da2       | 100.00 | Cry1Da2  | 100.00 | Cry1Da1       | 100.0 |
| OUA76866.1 | Cry1Ca8  | 100.0 | Cry1Ca9       | 100.00 | Cry1Ca9  | 100.00 | Cry1Ca7       | 100.0 |
| OUA76871.1 | Cry1Ia14 | 100.0 | Cry1Ia2       | 100.00 | Cry1Ia2  | 100.00 | Cry1Ia10      | 100.0 |
| OUB04094.1 | Cry41Ba2 | 100.0 | Cry41Ba2      | 100.00 | Cry41Ba2 | 100.00 | Cry41Ba2      | 100.0 |
| OUA92623.1 | Cry41Ba1 | 100.0 | Cry66Aa2      | 100.00 | Cry66Aa2 | 100.00 | Cry66Aa2      | 100.0 |
| OUB62847.1 | Cry20Ba2 | 100.0 | Cry20Ba1      | 98.95  | Cry20Ba1 | 98.73  | Cry20Ba1      | 98.8  |
| OUB51426.1 | Cry19Ba1 | 100.0 | Cry19Ba1      | 99.85  | Cry19Ba1 | 100.00 | Cry19Ba1      | 100.0 |
| OUB36504.1 | Cry73Aa1 | 100.0 | Cry41Aa1-like | 100.00 | Cry32Da1 | 40.72  | Cry41Aa1-like | 100.0 |
| OUB35201.1 | Cry8Ba1  | 97.0  | Cry8Ba1       | 98.37  | Cry8Ba1  | 99.13  | Cry8Ba1       | 97.0  |
| OUB29323.1 | Cry8Ba1  | 97.0  | Cry8Ba1       | 98.37  | Cry8Ba1  | 99.13  | Cry8Ba1       | 97.0  |
| OUB22932.1 | Cry8Ba1  | 97.0  | Cry8Ba1       | 98.37  | Cry8Ba1  | 99.13  | Cry8Ba1       | 97.0  |
| OUB21150.1 | Cry8Ba1  | 97.0  | Cry8Ba1       | 98.37  | Cry8Ba1  | 99.13  | Cry8Ba1       | 97.0  |
| OUB35623.1 | Cry4Ba1  | 63.8  | Cry4Ba5       | 63.88  | cry4Ba   | 63.51  | Cry4Ba        | 63.8  |
| OUB78400.1 | Cry25Aa1 | 97.8  | Cry25Aa1      | 97.78  | Cry25Aa1 | 97.75  | Cry25Aa1      | 97.8  |
| OUB77820.1 | Cry11Ba1 | 100.0 | Cry11Ba1      | 100.00 | *        | *      | Cry11Ba1      | 100.0 |
| OUB77817.1 | Cry70Bb1 | 67.1  | Cry31Aa6-like | 100.00 | *        | *      | Cry31Aa6-like | 100.0 |
| OUC03368.1 | Cry11Bb1 | 99.7  | –             | –      | *        | *      | Cry11Bb1      | 99.7  |
| OUC03129.1 | Cry29Aa1 | 96.4  | Cry29Aa1      | 96.43  | *        | *      | Cry29Aa1      | 96.4  |
| ARV91367.1 | Cry7Ba1  | 100.0 | Cry7Ba1       | 100.00 | Cry7Ba1  | 100.00 | Cry7Ba1       | 100.0 |
| ARV91400.1 | Cry7Ia1  | 100.0 | Cry7Ba1-like  | 99.91  | Cry7Ba1  | 44.29  | Cry7Ba1-like  | 99.9  |
| OXR51181.1 | Cry9Ea1  | 100.0 | Cry9Ea2       | 100.00 | Cry9Ea2  | 100.00 | Cry9Ea1       | 100.0 |
| OXR53711.1 | Cry1Ia14 | 100.0 | Cry1Ia2       | 100.00 | Cry1Ia2  | 100.00 | Cry1Ia10      | 100.0 |
| OXR53716.1 | Cry1Ca8  | 100.0 | Cry1Ca9       | 100.00 | Cry1Ca9  | 100.00 | Cry1Ca7       | 100.0 |
| OXR53718.1 | Cry1Da1  | 100.0 | Cry1Da2       | 100.00 | Cry1Da2  | 100.00 | Cry1Da1       | 100.0 |
| OXR51828.1 | Cry2Ab16 | 100.0 | Cry2Ab3       | 100.00 | *        | *      | Cry2Ab1       | 100.0 |
| AST05277.1 | Cry1Ba1  | 100.0 | Cry1Ba5       | 100.00 | Cry1Ba5  | 100.00 | Cry1Ba1       | 100.0 |
| PHQ17955.1 | Cry1Ca8  | 100.0 | Cry1Ca9       | 100.00 | Cry1Ca9  | 100.00 | Cry1Ca7       | 100.0 |
| PHQ17551.1 | Cry1Ia14 | 100.0 | Cry1Ia2       | 100.00 | Cry1Ia2  | 100.00 | Cry1Ia10      | 100.0 |
| PHQ17458.1 | Cry9Ea1  | 100.0 | Cry9Ea2       | 100.00 | Cry9Ea2  | 100.00 | Cry9Ea1       | 100.0 |
| PHQ17345.1 | Cry1Da1  | 100.0 | Cry1Da2       | 100.00 | Cry1Da2  | 100.00 | Cry1Da1       | 100.0 |
| PHQ18226.1 | Cry2Ab16 | 100.0 | Cry2Ab3       | 100.00 | *        | *      | Cry2Ab1       | 100.0 |
| PDY40352.1 | Cry5Ba1  | 99.8  | Cry5Ba1       | 99.84  | *        | *      | Cry5Ba1       | 99.8  |
| PDY37670.1 | Cry65Aa2 | 55.6  | Cry65Aa2      | 55.54  | *        | *      | Cry65Aa2      | 55.6  |
| PEA88281.1 | Cry19Aa1 | 29.2  | Cry27Aa1      | 30.84  | Cry27Aa1 | 31.53  | Cry19Aa1      | 29.2  |
| PEA91147.1 | Cry43Cb1 | 43.9  | Cry53Aa1      | 39.34  | Cry43Aa2 | 38.80  | Cry43Aa2      | 37.3  |
| PEA86378.1 | Cry4Cb3  | 34.4  | Cry4Cb2       | 34.44  | Cry4Cb2  | 34.59  | Cry4Cb2       | 34.3  |
| PEE63029.1 | Cry32Wa1 | 39.0  | Cry41Aa1-like | 38.02  | Cry41Ab1 | 35.12  | Cry41Ab1      | 33.8  |
| PEE68563.1 | Cry8Ja1  | 60.3  | Cry8Ja1       | 60.18  | Cry8Ja1  | 62.52  | Cry8Ja1       | 60.3  |
| PEE85821.1 | Cry32Wa1 | 39.0  | –             | –      | Cry41Ab1 | 35.12  | Cry41Ab1      | 33.8  |
| PEK85070.1 | Cry1Ia14 | 100.0 | Cry1Ia2       | 100.00 | Cry1Ia2  | 100.00 | Cry1Ia10      | 100.0 |
| PEK85073.1 | Cry2Aa1  | 100.0 | Cry2Aa9       | 100.00 | *        | *      | Cry2Aa1       | 100.0 |
| PEK97620.1 | Cry2Ab16 | 100.0 | Cry2Ab3       | 100.00 | *        | *      | Cry2Ab1       | 100.0 |
| PEU83535.1 | Cry69Ab1 | 58.0  | –             | –      | Cry53Ab1 | 35.63  | Cry43Ba1      | 41.1  |
| PEU81077.1 | Cry9Ga1  | 57.2  | Cry9Aa1       | 56.65  | Cry9Aa1  | 57.92  | Cry9Aa1       | 56.7  |

|            |          |       |               |        |          |        |               |       |
|------------|----------|-------|---------------|--------|----------|--------|---------------|-------|
| PEU80288.1 | Cry56Aa4 | 56.4  | Cry56Aa2      | 56.78  | Cry56Aa1 | 55.70  | Cry56Aa2      | 56.3  |
| PEU78339.1 | Cry40Da1 | 66.9  | Cry40Da1      | 66.87  | Cry40Da1 | 67.32  | Cry40Da1      | 66.9  |
| PEU78325.1 | Cry71Aa1 | 65.9  | Cry53Ab1      | 40.03  | Cry53Ab1 | 40.44  | Cry53Ab1      | 40.0  |
| PEU74801.1 | Cry70Ba1 | 97.3  | Cry31Aa6-like | 66.34  | *        | *      | Cry31Aa6-like | 65.1  |
| PEU91245.1 | Cry68Aa1 | 80.1  | Cry9Aa1       | 34.33  | Cry9Aa2  | 35.88  | Cry9Aa1       | 34.0  |
| PER42111.1 | Cry69Ab1 | 58.0  | –             | –      | Cry53Ab1 | 35.63  | Cry43Ba1      | 41.1  |
| PER41598.1 | Cry71Aa1 | 65.9  | –             | –      | Cry53Ab1 | 40.44  | Cry53Ab1      | 40.0  |
| PER39584.1 | Cry9Ga1  | 57.2  | –             | –      | Cry9Aa1  | 57.92  | Cry9Aa1       | 56.7  |
| PER38368.1 | Cry68Aa1 | 80.1  | –             | –      | Cry9Aa2  | 35.88  | Cry9Aa1       | 34.0  |
| PER37538.1 | Cry56Aa4 | 56.4  | –             | –      | Cry56Aa1 | 55.70  | Cry56Aa2      | 56.3  |
| PER55269.1 | Cry40Da1 | 66.9  | –             | –      | Cry40Da1 | 67.32  | Cry40Da1      | 66.9  |
| PER34669.1 | Cry70Ba1 | 97.3  | –             | –      | *        | *      | Cry31Aa6-like | 65.1  |
| PFB88478.1 | Cry32Wa1 | 39.2  | Cry41Aa1-like | 38.17  | Cry41Ab1 | 35.28  | Cry41Ab1      | 33.8  |
| PFE13212.1 | Cry32Ma1 | 37.1  | Cry41Aa1-like | 38.17  | Cry41Ab1 | 35.12  | Cry41Ab1      | 33.8  |
| PFE36768.1 | Cry65Aa2 | 70.8  | Cry65Aa2      | 70.66  | *        | *      | Cry65Aa2      | 70.8  |
| PFE29821.1 | Cry5Ba1  | 99.8  | Cry5Ba1       | 99.84  | *        | *      | Cry5Ba1       | 99.8  |
| PFE45262.1 | Cry5Aa1  | 100.0 | Cry5Aa1       | 100.00 | *        | *      | Cry5Aa1       | 100.0 |
| PFA82393.1 | Cry1Ib11 | 99.9  | Cry1Ib9       | 98.75  | Cry1Ib6  | 100.00 | Cry1Ib10      | 98.7  |
| PFA97486.1 | Cry1Ja1  | 100.0 | Cry1Ja1       | 100.00 | Cry1Ja1  | 100.00 | Cry1Ja1       | 100.0 |
| PEZ39117.1 | Cry21Ba1 | 28.9  | Cry21Ba1      | 28.31  | *        | *      | Cry21Ba1      | 28.9  |
| PFF41055.1 | Cry8Aa1  | 46.1  | –             | –      | Cry8Aa1  | 47.00  | Cry8Aa1       | 46.1  |
| PFI05053.1 | Cry9Ga1  | 57.2  | –             | –      | Cry9Aa1  | 57.92  | Cry9Aa1       | 56.7  |
| PFI04008.1 | Cry71Aa1 | 65.9  | –             | –      | Cry53Ab1 | 40.44  | Cry53Ab1      | 40.0  |
| PFH99743.1 | Cry68Aa1 | 80.1  | –             | –      | Cry9Aa2  | 35.88  | Cry9Aa1       | 34.0  |
| PFH99578.1 | Cry56Aa4 | 56.4  | –             | –      | Cry56Aa1 | 55.70  | Cry56Aa2      | 56.3  |
| PFH99374.1 | Cry69Ab1 | 58.0  | –             | –      | Cry53Ab1 | 35.63  | Cry43Ba1      | 41.1  |
| PFH98146.1 | Cry40Da1 | 66.9  | –             | –      | Cry40Da1 | 67.32  | Cry40Da1      | 66.9  |
| PFI06834.1 | Cry70Ba1 | 97.3  | –             | –      | *        | *      | Cry31Aa6-like | 65.1  |
| PFJ62899.1 | Cry32Ma1 | 37.1  | –             | –      | Cry41Ab1 | 35.12  | Cry41Ab1      | 33.8  |
| PFK99360.1 | Cry32Wa1 | 39.2  | Cry41Aa1-like | 38.17  | Cry41Ab1 | 35.61  | Cry41Ab1      | 34.0  |
| PFM86094.1 | Cry32Wa1 | 39.0  | –             | –      | Cry41Ab1 | 35.12  | Cry41Ab1      | 33.8  |
| PFP10217.1 | Cry32Wa1 | 39.0  | Cry41Aa1-like | 38.02  | Cry41Ab1 | 34.95  | Cry41Ab1      | 33.7  |
| PFT09171.1 | Cry8Aa1  | 46.1  | –             | –      | Cry8Aa1  | 47.00  | Cry8Aa1       | 46.1  |
| PFV01225.1 | Cry32Ma1 | 37.1  | –             | –      | Cry41Ab1 | 35.12  | Cry41Ab1      | 33.8  |
| PFT97155.1 | Cry5Ba1  | 99.8  | Cry5Ba1       | 99.84  | *        | *      | Cry5Ba1       | 99.8  |
| PFU07373.1 | Cry65Aa2 | 70.8  | –             | –      | *        | *      | Cry65Aa2      | 70.8  |
| PFV85565.1 | Cry32Wa1 | 39.2  | Cry41Aa1-like | 38.17  | Cry41Ab1 | 35.28  | Cry41Ab1      | 34.0  |
| PFW25264.1 | Cry71Aa1 | 65.9  | –             | –      | Cry53Ab1 | 40.44  | Cry53Ab1      | 40.0  |
| PFW49142.1 | Cry9Ga1  | 58.2  | Cry9Aa2       | 57.92  | Cry9Aa1  | 57.92  | Cry9Aa1       | 57.8  |
| PFW24146.1 | Cry68Aa1 | 80.1  | –             | –      | Cry9Aa2  | 35.88  | Cry9Aa1       | 34.0  |
| PFW19349.1 | Cry69Ab1 | 58.0  | –             | –      | Cry53Ab1 | 35.63  | Cry43Ba1      | 41.1  |
| PFW18565.1 | Cry70Ba1 | 97.3  | –             | –      | *        | *      | Cry31Aa6-like | 65.1  |
| PFW17822.1 | Cry40Da1 | 66.9  | –             | –      | Cry40Da1 | 67.32  | Cry40Da1      | 66.9  |
| PFW20907.1 | Cry56Aa4 | 56.4  | –             | –      | Cry56Aa1 | 55.70  | Cry56Aa2      | 56.3  |
| PGE54611.1 | Cry2Aa1  | 100.0 | Cry2Aa9       | 100.00 | *        | *      | Cry2Aa1       | 100.0 |
| PGE54614.1 | Cry1Ia14 | 100.0 | Cry1Ia2       | 100.00 | Cry1Ia2  | 100.00 | Cry1Ia10      | 100.0 |
| PGE63619.1 | Cry2Ab16 | 100.0 | Cry2Ab3       | 100.00 | *        | *      | Cry2Ab1       | 100.0 |
| PGK06240.1 | Cry2Aa1  | 100.0 | Cry2Aa9       | 100.00 | *        | *      | Cry2Aa1       | 100.0 |
| PGK06243.1 | Cry1Ia14 | 100.0 | Cry1Ia2       | 100.00 | Cry1Ia2  | 100.00 | Cry1Ia10      | 100.0 |
| PGK06244.1 | Cry1Aa12 | 100.0 | Cry1Aa3       | 100.00 | Cry1Aa3  | 100.00 | Cry1Aa12      | 100.0 |
| PGK06250.1 | Cry2Ab16 | 100.0 | Cry2Ab3       | 100.00 | *        | *      | Cry2Ab1       | 100.0 |
| PGH98789.1 | Cry1Ba1  | 99.9  | Cry1Ba5       | 99.92  | Cry1Ba5  | 100.00 | Cry1Ba1       | 99.9  |
| PGK36565.1 | Cry8Aa1  | 46.1  | –             | –      | Cry8Aa1  | 47.00  | Cry8Aa1       | 46.1  |
| PGL13502.1 | Cry5Ba1  | 99.6  | Cry5Ba1       | 99.60  | *        | *      | Cry5Ba1       | 99.6  |
| PGO36223.1 | Cry5Aa1  | 99.7  | Cry5Aa1       | 99.62  | *        | *      | Cry5Aa1       | 99.7  |
| PGO34936.1 | Cry5Ba1  | 99.8  | Cry5Ba1       | 99.84  | *        | *      | Cry5Ba1       | 99.8  |
| PGO34728.1 | Cry65Aa2 | 55.6  | –             | –      | *        | *      | Cry65Aa2      | 55.6  |
| PGP47008.1 | Cry32Wa1 | 39.0  | –             | –      | Cry41Ab1 | 34.95  | Cry41Ab1      | 33.7  |

|            |          |       |               |        |          |        |                   |       |
|------------|----------|-------|---------------|--------|----------|--------|-------------------|-------|
| PGR92655.1 | Cry32Wa1 | 39.2  | –             | –      | Cry41Ab1 | 35.28  | Cry41Ab1          | 34.0  |
| PGU92045.1 | Cry32Wa1 | 39.0  | Cry41Aa1-like | 38.02  | Cry41Ab1 | 34.93  | Cry41Ab1          | 33.7  |
| PHD77627.1 | Cry2Ab16 | 100.0 | Cry2Ab3       | 100.00 | *        | *      | Cry2Ab1           | 100.0 |
| PHD85153.1 | Cry2Aa1  | 100.0 | Cry2Aa9       | 100.00 | *        | *      | Cry2Aa1           | 100.0 |
| PHD85156.1 | Cry1Ia14 | 100.0 | Cry1Ia2       | 100.00 | Cry1Ia2  | 100.00 | Cry1Ia10          | 100.0 |
| PGY60137.1 | Cry32Wa1 | 39.0  | –             | –      | Cry41Ab1 | 34.95  | Cry41Ab1          | 33.7  |
| PGW42274.1 | Cry14Aa1 | 44.0  | Cry14Aa1      | 43.98  | *        | *      | Cry14Aa1          | 44.0  |
| PGW46196.1 | Cry14Ab1 | 42.4  | Cry14Aa1      | 42.46  | *        | *      | Cry14Aa1          | 42.4  |
| PGW46198.1 | Cry14Aa1 | 41.1  | Cry14Aa1      | 41.19  | *        | *      | Cry14Aa1          | 41.1  |
| PGY63215.1 | Cry21Ba1 | 28.9  | –             | –      | *        | *      | Cry21Ba1          | 28.9  |
| PGY64190.1 | Cry70Ba1 | 97.3  | –             | –      | *        | *      | Cry31Aa6-like     | 65.1  |
| PGY64183.1 | Cry68Aa1 | 80.1  | –             | –      | Cry9Aa2  | 35.88  | Cry9Aa1           | 34.0  |
| PGY64101.1 | Cry40Da1 | 66.9  | –             | –      | Cry40Da1 | 67.32  | Cry40Da1          | 66.9  |
| PGY63227.1 | Cry71Aa1 | 65.9  | –             | –      | Cry53Ab1 | 40.44  | Cry53Ab1          | 40.0  |
| PGY73908.1 | Cry69Ab1 | 58.0  | –             | –      | Cry53Ab1 | 35.63  | Cry43Ba1          | 41.1  |
| PHG40087.1 | Cry2Ab16 | 100.0 | Cry2Ab3       | 100.00 | *        | *      | Cry2Ab1           | 100.0 |
| PHG55433.1 | Cry1Ia14 | 100.0 | Cry1Ia2       | 100.00 | Cry1Ia2  | 100.00 | Cry1Ia10          | 100.0 |
| PHG55436.1 | Cry2Aa1  | 100.0 | Cry2Aa9       | 100.00 | *        | *      | Cry2Aa1           | 100.0 |
| PHF50510.1 | Cry2Aa1  | 100.0 | Cry2Aa9       | 100.00 | *        | *      | Cry2Aa1           | 100.0 |
| PHF50513.1 | Cry1Ia14 | 100.0 | Cry1Ia2       | 100.00 | Cry1Ia2  | 100.00 | Cry1Ia10          | 100.0 |
| PHF69249.1 | Cry2Ab16 | 100.0 | Cry2Ab3       | 100.00 | *        | *      | Cry2Ab1           | 100.0 |
| PNK22955.1 | Cry8Db1  | 51.1  | Cry8Db1       | 51.12  | Cry8Fa1  | 47.56  | Cry8Db1           | 51.1  |
| PNK22471.1 | Cry8Ga2  | 100.0 | Cry8Ga3       | 100.00 | Cry8Ga3  | 100.00 | Cry8Ga2           | 100.0 |
| PNK25039.1 | Cry8Fa1  | 100.0 | Cry8Fa1       | 100.00 | Cry8Fa1  | 100.00 | Cry8Fa1           | 100.0 |
| PNK32300.1 | Cry8Ab1  | 80.0  | –             | –      | Cry8Ab1  | 80.27  | Cry8Ab1           | 80.0  |
| PNK28167.1 | Cry8Ea3  | 100.0 | Cry8Ea1       | 100.00 | Cry8Ea1  | 100.00 | Cry8Ea1           | 100.0 |
| PNK28168.1 | Cry8Ca1  | 99.8  | Cry8Ca1       | 99.83  | Cry8Ca4  | 99.83  | Cry8Ca1           | 99.8  |
| PNK22276.1 | Cry2Aa1  | 100.0 | Cry2Aa9       | 100.00 | *        | *      | Cry2Aa1           | 100.0 |
| PNK41404.1 | Cry1Ka2  | 100.0 | Cry1Ka1       | 99.16  | Cry1Ka1  | 98.94  | Cry1Ka1           | 98.4  |
| PNK40066.1 | Cry1Fb3  | 99.9  | Cry1Fb4       | 99.78  | Cry1Fb4  | 99.82  | Cry1Fb3           | 99.9  |
| PNK40029.1 | Cry1Da3  | 99.9  | Cry1Da2       | 98.69  | Cry1Da2  | 99.82  | Cry1Da1           | 98.7  |
| PNK40024.1 | Cry1Ib11 | 99.9  | Cry1Ib9       | 98.75  | Cry1Ib6  | 100.00 | Cry1Ib10          | 98.7  |
| PNK40012.1 | Cry1Ab18 | 100.0 | Cry1Ab18      | 100.00 | Cry1Ab18 | 100.00 | Cry1Ab18          | 100.0 |
| PNK46490.1 | Cry1Bb1  | 99.9  | Cry1Bb1       | 99.91  | Cry1Bc1  | 100.00 | Cry1Bb1           | 99.9  |
| PNK46492.1 | Cry1Hb1  | 100.0 | Cry1Hb1       | 100.00 | Cry1Hb1  | 100.00 | Cry1Hb1           | 100.0 |
| PNK42250.1 | Cry1Id1  | 100.0 | Cry1Id1       | 100.00 | Cry1Id1  | 100.00 | Cry1Id1           | 100.0 |
| PNK42253.1 | Cry1Ja2  | 100.0 | Cry1Ja1       | 99.57  | Cry1Ja1  | 99.09  | Cry1Ja1           | 99.6  |
| PNK42258.1 | Cry1Nb1  | 100.0 | –             | –      | Cry1Ca4  | 52.73  | PesticidalProtein | 100.0 |
| PNK47117.1 | Cry8Db1  | 51.1  | –             | –      | Cry8Fa1  | 47.56  | Cry8Db1           | 51.1  |
| PNK46110.1 | Cry8Ga2  | 100.0 | Cry8Ga3       | 100.00 | Cry8Ga3  | 100.00 | Cry8Ga2           | 100.0 |
| PNK42405.1 | Cry1Ca8  | 100.0 | Cry1Ca9       | 100.00 | Cry1Ca9  | 100.00 | Cry1Ca7           | 100.0 |
| PNK42101.1 | Cry2Ab16 | 100.0 | Cry2Ab3       | 100.00 | *        | *      | Cry2Ab1           | 100.0 |
| PNK41517.1 | Cry1Ia14 | 100.0 | Cry1Ia2       | 100.00 | Cry1Ia2  | 100.00 | Cry1Ia10          | 100.0 |
| PNK41087.1 | Cry9Ea1  | 100.0 | Cry9Ea2       | 100.00 | Cry9Ea2  | 100.00 | Cry9Ea1           | 100.0 |
| PNK40022.1 | Cry1Da1  | 100.0 | Cry1Da2       | 100.00 | Cry1Da2  | 100.00 | Cry1Da1           | 100.0 |
| PQQ47595.1 | Cry1Ie5  | 79.3  | Cry1Ib4       | 79.69  | Cry1Ib1  | 81.69  | Cry1Ib4           | 79.7  |
| PQQ47537.1 | Cry73Aa1 | 40.0  | –             | –      | *        | *      | Cry41Aa1-like     | 40.0  |
| PTN43520.1 | Cry1Ac10 | 100.0 | Cry1Ac9       | 100.00 | Cry1Ac9  | 100.00 | Cry1Ac1           | 100.0 |
| RBN53067.1 | Cry1Ca8  | 100.0 | Cry1Ca9       | 100.00 | Cry1Ca9  | 100.00 | Cry1Ca7           | 100.0 |
| RBN52662.1 | Cry1Ia14 | 100.0 | Cry1Ia2       | 100.00 | Cry1Ia2  | 100.00 | Cry1Ia10          | 100.0 |
| RBN52569.1 | Cry9Ea1  | 100.0 | Cry9Ea2       | 100.00 | Cry9Ea2  | 100.00 | Cry9Ea1           | 100.0 |
| RBN52453.1 | Cry1Da1  | 100.0 | Cry1Da2       | 100.00 | Cry1Da2  | 100.00 | Cry1Da1           | 100.0 |
| RBN53338.1 | Cry2Ab16 | 100.0 | Cry2Ab3       | 100.00 | *        | *      | Cry2Ab1           | 100.0 |
| AXY11181.1 | Cry41Ca1 | 100.0 | Cry41Ba2      | 63.87  | Cry41Ba2 | 72.64  | Cry41Ba2          | 63.5  |
| AXY11292.1 | Cry32Wa1 | 100.0 | Cry41Aa1-like | 57.91  | Cry32Da1 | 40.24  | Cry41Aa1-like     | 58.2  |
| AXY11305.1 | Cry32Va1 | 100.0 | Cry32Aa1      | 58.09  | Cry32Aa1 | 41.34  | Cry32Aa1          | 56.3  |
| AXY11484.1 | Cry32Ma1 | 57.7  | Cry32Aa1      | 54.52  | Cry41Ab1 | 52.93  | Cry32Aa1          | 53.4  |
| AYF84829.1 | Cry8Fa1  | 100.0 | Cry8Fa1       | 100.00 | Cry8Fa1  | 100.00 | Cry8Fa1           | 100.0 |

|            |          |       |          |        |          |        |          |       |
|------------|----------|-------|----------|--------|----------|--------|----------|-------|
| AYF84849.1 | Cry8Ea3  | 100.0 | Cry8Ea1  | 100.00 | Cry8Ea1  | 100.00 | Cry8Ea1  | 100.0 |
| AYF84850.1 | Cry8Ca1  | 99.8  | Cry8Ca1  | 99.83  | Cry8Ca4  | 99.83  | Cry8Ca1  | 99.8  |
| AYF84876.1 | Cry8Ab1  | 80.0  | –        | –      | Cry8Ab1  | 80.27  | Cry8Ab1  | 80.0  |
| RNG36219.1 | Cry3Aa1  | 100.0 | Cry3Aa7  | 100.00 | Cry3Aa7  | 100.00 | Cry3Aa1  | 100.0 |
| AZR80780.1 | Cry21Ca2 | 64.6  | Cry21Ba1 | 50.22  | *        | *      | Cry21Aa2 | 48.1  |
| AZR80678.1 | Cry5Ba1  | 27.2  | Cry5Ba1  | 27.62  | *        | *      | Cry5Ba1  | 27.2  |
| AZR80706.1 | Cry21Aa2 | 99.7  | Cry21Aa2 | 99.66  | *        | *      | Cry21Aa2 | 99.7  |
| AZR80772.1 | Cry21Aa2 | 44.6  | Cry21Aa2 | 46.34  | *        | *      | Cry21Aa2 | 44.6  |
| AZR80774.1 | Cry21Ca2 | 65.9  | Cry21Ba1 | 50.08  | *        | *      | Cry21Ba1 | 50.0  |
| RVU62660.1 | Cry12Aa1 | 100.0 | Cry12Aa1 | 100.00 | *        | *      | Cry12Aa1 | 100.0 |
| RYS59630.1 | Cry2Aa1  | 100.0 | Cry2Aa9  | 100.00 | *        | *      | Cry2Aa1  | 100.0 |
| RYS59633.1 | Cry1Ia14 | 100.0 | Cry1Ia2  | 100.00 | Cry1Ia2  | 100.00 | Cry1Ia10 | 100.0 |
| RYS58618.1 | Cry2Ab16 | 100.0 | Cry2Ab3  | 100.00 | *        | *      | Cry2Ab1  | 100.0 |
| QBP15688.1 | Cry11Aa1 | 100.0 | Cry11Aa3 | 100.00 | *        | *      | Cry11Aa1 | 100.0 |
| QBP15695.1 | Cry4Ba1  | 100.0 | Cry4Ba5  | 100.00 | cry4Ba   | 100.00 | Cry4Ba   | 100.0 |
| QBP15696.1 | Cry10Aa3 | 100.0 | Cry10Aa4 | 100.00 | Cry10Aa4 | 100.00 | Cry10Aa3 | 100.0 |
| QBP15732.1 | Cry4Aa2  | 100.0 | Cry4Aa4  | 100.00 | Cry4Aa4  | 100.00 | Cry4Aa2  | 100.0 |
| TBX61382.1 | Cry9Ea1  | 100.0 | Cry9Ea2  | 100.00 | Cry9Ea2  | 100.00 | Cry9Ea1  | 100.0 |
| TBX73091.1 | Cry1Ab12 | 100.0 | Cry1Ab9  | 100.00 | Cry1Ab14 | 100.00 | Cry1Ab1  | 100.0 |
| TBX72000.1 | Cry1Aa11 | 100.0 | Cry1Aa19 | 100.00 | Cry1Aa5  | 100.00 | Cry1Aa1  | 100.0 |
| TBX99229.1 | Cry1Ia14 | 100.0 | Cry1Ia2  | 100.00 | Cry1Ia2  | 100.00 | Cry1Ia10 | 100.0 |
| TBX99235.1 | Cry1Ca8  | 100.0 | Cry1Ca9  | 100.00 | Cry1Ca9  | 100.00 | Cry1Ca7  | 100.0 |
| TBX99239.1 | Cry1Da1  | 100.0 | Cry1Da2  | 100.00 | Cry1Da2  | 100.00 | Cry1Da1  | 100.0 |
| TBX88898.1 | Cry2Ab16 | 100.0 | Cry2Ab3  | 100.00 | *        | *      | Cry2Ab1  | 100.0 |
| QBM59570.1 | Cry11Aa1 | 100.0 | Cry11Aa3 | 100.00 | *        | *      | Cry11Aa1 | 100.0 |
| QBM59577.1 | Cry4Ba1  | 100.0 | Cry4Ba5  | 100.00 | cry4Ba   | 100.00 | Cry4Ba   | 100.0 |
| QBM59578.1 | Cry10Aa3 | 100.0 | Cry10Aa4 | 100.00 | Cry10Aa4 | 100.00 | Cry10Aa3 | 100.0 |
| QBM59613.1 | Cry4Aa2  | 100.0 | Cry4Aa4  | 100.00 | Cry4Aa4  | 100.00 | Cry4Aa2  | 100.0 |
| TEA80813.1 | Cry5Ba1  | 48.7  | Cry5Ba1  | 48.81  | *        | *      | Cry5Ba1  | 48.7  |

\* BtToxin\_scanner web-server was unavailable when benchmarking was performed, thus, we provide data for comparison between the older version of Cry processor, proteins that were neglected by the older version of CryProcessor are marked with asterisks (github hash 4b0dc).
